# Supplementary material
Source: Research Square preprint supplement (doi:10.21203/rs.3.rs-9011698/v1)
Supplement: Supplementary file 1 [file c91270eda64a3b8b606f41b2.xlsx]

## Sheet: 报告
	报告：成功合并 57 个工作表。
	工作簿	工作表	合并状态	合并后的位置
	工作簿3	报告	成功	报告 (2)'
	工作簿3	农作物种植面积	成功	农作物种植面积
	工作簿3	茶园面积	成功	茶园面积
	工作簿3	果园面积	成功	果园面积
	工作簿3	种植业汇总数据	成功	种植业汇总数据
	工作簿3	园区总磷排污	成功	园区总磷排污
	工作簿3	园区氮排污	成功	园区氮排污
	工作簿3	粮食总磷排污	成功	粮食总磷排污
	工作簿3	粮食总氮排污	成功	粮食总氮排污
	2.畜禽养殖规模化率.xlsx	畜牧养殖业 规模化率 养殖户率	成功	畜牧养殖业 规模化率 养殖户率'
	2.畜牧业不同污染源计算.xlsx	畜禽养殖业不同类别存栏量	成功	畜禽养殖业不同类别存栏量
	2.畜牧业不同污染源计算.xlsx	生猪存栏规模化 CODcr	成功	生猪存栏规模化 CODcr'
	2.畜牧业不同污染源计算.xlsx	生猪存栏 养殖户CODcr	成功	生猪存栏 养殖户CODcr'
	2.畜牧业不同污染源计算.xlsx	生猪存栏规模化 总氮	成功	生猪存栏规模化 总氮'
	2.畜牧业不同污染源计算.xlsx	生猪存栏 养殖户总氮	成功	生猪存栏 养殖户总氮 '
	2.畜牧业不同污染源计算.xlsx	生猪存栏规模化 总磷	成功	生猪存栏规模化 总磷'
	2.畜牧业不同污染源计算.xlsx	生猪存栏 养殖户总磷	成功	生猪存栏 养殖户总磷'
	2.畜牧业不同污染源计算.xlsx	肉牛 规模CODcr	成功	肉牛 规模CODcr'
	2.畜牧业不同污染源计算.xlsx	肉牛养殖CODcr	成功	肉牛养殖CODcr
	2.畜牧业不同污染源计算.xlsx	肉牛规模 总氮	成功	肉牛规模 总氮'
	2.畜牧业不同污染源计算.xlsx	肉牛养殖 总氮	成功	肉牛养殖 总氮'
	2.畜牧业不同污染源计算.xlsx	肉牛规模 总磷	成功	肉牛规模 总磷'
	2.畜牧业不同污染源计算.xlsx	肉牛养殖 总磷	成功	肉牛养殖 总磷'
	2.畜牧业不同污染源计算.xlsx	奶牛规模CODcr	成功	奶牛规模CODcr
	2.畜牧业不同污染源计算.xlsx	奶牛养殖 CODcr	成功	奶牛养殖 CODcr'
	2.畜牧业不同污染源计算.xlsx	奶牛规模 总氮	成功	奶牛规模 总氮'
	2.畜牧业不同污染源计算.xlsx	奶牛养殖 总氮	成功	奶牛养殖 总氮'
	2.畜牧业不同污染源计算.xlsx	奶牛规模 总磷	成功	奶牛规模 总磷'
	2.畜牧业不同污染源计算.xlsx	奶牛养殖 总磷	成功	奶牛养殖 总磷'
	2.畜牧业不同污染源计算.xlsx	家禽规模 CODcr	成功	家禽规模 CODcr'
	2.畜牧业不同污染源计算.xlsx	家禽养殖 CODcr	成功	家禽养殖 CODcr'
	2.畜牧业不同污染源计算.xlsx	家禽规模 总氮	成功	家禽规模 总氮'
	2.畜牧业不同污染源计算.xlsx	家禽养殖 总氮	成功	家禽养殖 总氮'
	2.畜牧业不同污染源计算.xlsx	家禽规模 总磷	成功	家禽规模 总磷'
	2.畜牧业不同污染源计算.xlsx	家禽养殖 总磷	成功	家禽养殖 总磷'
	2畜牧养殖业.xlsx	畜牧业最终化学需氧量	成功	畜牧业最终化学需氧量
	2畜牧养殖业.xlsx	畜牧业最终氮	成功	畜牧业最终氮
	2畜牧养殖业.xlsx	畜牧业最终磷	成功	畜牧业最终磷
	人工养殖海水产品产量.xls	人工养殖海水产品产量	成功	人工养殖海水产品产量
	人工养殖海水产品产量.xls	人工养殖淡水产品产量	成功	人工养殖淡水产品产量
	3水产养殖业.xlsx	汇总数据	成功	汇总数据
	3水产养殖业.xlsx	人工养殖水产品产量	成功	人工养殖水产品产量
	3水产养殖业.xlsx	TP	成功	TP
	3水产养殖业.xlsx	TN	成功	TN
	3水产养殖业.xlsx	CODcr	成功	CODcr
	农业面源污染排放总量及相关数据.xlsx	农业面源污染最终数据	成功	农业面源污染最终数据
	农业面源污染排放总量及相关数据.xlsx	各省份逐年人均农业面源污染	成功	各省份逐年人均农业面源污染
	农业面源污染排放总量及相关数据.xlsx	全国逐年人均农业面源污染	成功	全国逐年人均农业面源污染
	排污系数.xlsx	排污系数	成功	排污系数
	排污系数.xlsx	水产养殖业排污系数	成功	水产养殖业排污系数
	排污系数.xlsx	畜禽规模化养殖排污系数	成功	畜禽规模化养殖排污系数
	排污系数.xlsx	畜禽养殖户养殖排污系数	成功	畜禽养殖户养殖排污系数
	排污系数.xlsx	生猪规模化 养殖户	成功	生猪规模化 养殖户'
	排污系数.xlsx	肉牛规模化 养殖户	成功	肉牛规模化 养殖户'
	排污系数.xlsx	奶牛规模化 养殖户	成功	奶牛规模化 养殖户'
	排污系数.xlsx	家禽规模化 养殖户	成功	家禽规模化 养殖户'
	排污系数.xlsx	规模化养殖占比	成功	规模化养殖占比

## Sheet: 报告 (2)
	报告：成功合并 8 个工作表。
	工作簿	工作表	合并状态	合并后的位置
	茶园面积.xls	农作物种植面积	成功	农作物种植面积
	茶园面积.xls	茶园面积	成功	茶园面积
	茶园面积.xls	果园面积	成功	果园面积
	1种植业.xlsx	种植业汇总数据	成功	种植业汇总数据
	1种植业.xlsx	园区总磷排污	成功	园区总磷排污
	1种植业.xlsx	园区氮排污	成功	园区氮排污
	1种植业.xlsx	粮食总磷排污	成功	粮食总磷排污
	1种植业.xlsx	粮食总氮排污	成功	粮食总氮排污

## Sheet: 农作物种植面积
数据库：分省年度数据
指标：农作物总播种面积(千公顷)
时间：最近20年
时间	北京市	天津市	河北省	山西省	内蒙古自治区	辽宁省	吉林省	黑龙江省	上海市	江苏省	浙江省	安徽省	福建省	江西省	山东省	河南省	湖北省	湖南省	广东省	广西壮族自治区	海南省	重庆市	四川省	贵州省	云南省	西藏自治区	陕西省	甘肃省	青海省	宁夏回族自治区	新疆维吾尔自治区
2023年	158.98	453.1	8098.23	3641.72	8808.87	4361.42	6292.47	15304.2	273.2	7589.96	2041.38	9043.96	1712.25	5797.01	11002.7	14747.1	8309.25	8714.95	4587.27	6352.35	702.36	3506.19	10264.4	5344.29	7218.08	281.4	4239.94	4139.59	598.8	1199.1	6839.83
2022年	143.81	443.51	8113.99	3611.59	8750.68	4326.86	6226.36	15209.4	269.17	7534.24	2027.16	8933.59	1682.14	5730.55	10964.1	14711.5	8191.92	8591.54	4553.47	6271.4	687.18	3479.02	10227.4	5359.45	7130.63	277.24	4212.23	4061.94	586.19	1189.49	6493.13
2021年	117.85	437	8097.2	3587.95	8743.34	4328.94	6187.06	15065	264.35	7514.45	2014.59	8886.77	1651.87	5672.94	10948.6	14705.1	8109.24	8504.26	4498.36	6177.52	684.78	3409.26	9999.92	5422.88	7057.24	274.19	4189.27	3997.94	583.87	1175.91	6387.42
2020年	98.18	419.17	8089.44	3541.51	8882.81	4287.78	6150.99	14910.1	255.16	7478.4	2014.5	8817.99	1631.27	5644.37	10889.1	14688	7974.39	8400.13	4451.81	6107.32	676.86	3372.54	9849.89	5475.35	6989.67	272.08	4160.85	3931.82	571.42	1174.23	6280.01
2019年	88.55	410.27	8132.69	3524.42	8885.02	4217.1	6117.05	14770.1	261.39	7442.63	1999.62	8781.96	1599.29	5521.18	10933.1	14714	7815.89	8122.79	4357.38	5989.21	676.24	3345.74	9692.98	5481.56	6938.86	271.53	4132.09	3831.57	553.54	1152.96	6169.99
2018年	103.79	429.27	8197.13	3555.16	8824.07	4207.11	6080.89	14673.3	282.27	7520.23	1978.68	8771.11	1577.31	5555.81	11076.8	14783.4	7952.9	8111.09	4279.36	5972.38	712.94	3348.49	9615.32	5477.16	6890.77	270.38	4091.01	3773.55	557.25	1164.57	6068.89
2017年	120.94	439.52	8381.65	3577.62	9014.22	4172.32	6086.2	14767.6	284.95	7556.4	1981.11	8726.68	1549.34	5638.46	11107.8	14732.5	7956.14	8321.97	4227.51	5969.88	709.44	3339.56	9575.05	5659.37	6790.8	254.05	4063.88	3752.03	555.31	1132.63	5886.96
2016年	145.55	443.66	8467.51	3591.54	8957.21	4242.73	6063.25	14829.5	303.78	7639.9	1946.46	8790.1	1548.8	5668.88	11278.6	14902.7	7908.5	8341.5	4181.56	5966.74	731.9	3333.1	9493.82	5604.8	6786.62	263.15	4160.15	3749.2	557.75	1118.85	5921.27
2015年	172.14	433.28	8457.76	3612.65	8423.68	4335.47	5997.91	14811.9	350.64	7693.7	1977.8	9598.29	1617.17	5688.41	11381	14879.7	7983.43	8355.22	4194.55	6078.81	757.5	3311.32	9451.06	5532.9	6818.64	229.69	4050	3768.38	558.39	1132.43	5175.47
2014年	194.64	443.01	8454.9	3664.57	8079.08	4219.8	5890.5	14497.7	369.91	7615.79	1986.77	9500.18	1670.17	5667.34	11316.6	14731.5	7791.42	8398.63	4225.19	5855.03	779.4	3288.58	9377.7	5510.5	6842.84	227.1	4053.87	3775.83	553.7	1126.76	5074.23
2013年	237.29	441.34	8416.01	3667.89	7823.05	4154.41	5632.95	14212	391.3	7597.93	2062.45	9364.9	1740.96	5636.98	11136.6	14586.5	7731.26	8352.67	4178.17	6076.46	772.48	3318.49	9371.69	5388.73	6848.56	225.77	4108.22	3779.84	555.77	1147.08	4744.47
2012年	278.03	448.98	8361.89	3696.23	7670.84	4095.55	5431.98	13929.7	401.64	7569.22	2095.67	9336.3	1761.23	5596.83	10862.3	14386.9	7684.4	8299.62	4248.43	6036.16	786.57	3320.31	9319.58	5201.03	6674.13	220.24	4182.84	3770.7	554.21	1176.46	4673.34
2011年	298.62	442.45	8278.32	3694.41	7539.51	3997.53	5297.23	13749.6	420.03	7508.44	2267.84	9392.44	1878.97	5546.41	10782.9	14373.3	7454.98	8178.06	4244.73	5899.88	782.4	3225.78	9215.4	4998.1	6484.91	219.04	4193.6	3774.33	540.05	1205.76	4475.41
2010年	313.62	438.78	8260.75	3638.11	7362.07	3950.14	5258.93	13347.6	415.58	7462.35	2322.55	9386.19	1945.91	5505	10677.4	14320.8	7377.94	8057.99	4262.77	5896.37	786.75	3129.85	9158.73	4896.93	6257.06	218.86	4237.57	3723.47	526.75	1205.86	4236.75
2009年	316.76	440.31	8416.08	3561.48	6895.77	3810.64	5091.09	12840.7	415.4	7407.98	2444.08	9344.68	2075.31	5488.36	10910	14235.7	7328.5	7852.21	4277.45	5964.99	800.44	3110.74	9157.82	4802.59	6381.56	214.62	4207.83	3693.94	514.06	1205.32	4036.09
注：根据第三次全国农业普查结果，对2007年-2017年农业生产有关数据进行了修正。
数据来源：国家统计局

## Sheet: 茶园面积
数据库：分省年度数据
指标：实有茶园面积(千公顷)
时间：最近20年
时间	北京市	天津市	河北省	山西省	内蒙古自治区	辽宁省	吉林省	黑龙江省	上海市	江苏省	浙江省	安徽省	福建省	江西省	山东省	河南省	湖北省	湖南省	广东省	广西壮族自治区	海南省	重庆市	四川省	贵州省	云南省	西藏自治区	陕西省	甘肃省	青海省	宁夏回族自治区	新疆维吾尔自治区
2023年		0.04	0.02	0.96	0	0.01		0	0.16	33.97	210.69	211.9	248.47	122.09	27.16	116.79	383.11	216.1	112.66	107.23	2.61	56.01	414.38	450.02	535.51	3.78	163.29	12.93		0.04
2022年			0.03	1.33	0			0	0.14	33.9	208.73	209.27	241	120.02	26.74	116.63	376.06	210.47	99.46	102.51	2.34	55.71	410.6	470.6	530.31	3.47	160.68	12.7	0
2021年			0.02	1.13	0				0.17	34.21	206.16	205.01	232.09	117.13	26.93	115.78	369.08	203.3	89.27	96.07	2.33	54.34	404.85	472.23	504.61	4.33	156.53	12.27
2020年			0.01	0.8					0.12	34.24	206.6	194.71	223.94	113.2	27.17	113	358.39	185.77	78.19	91.28	2.2	52.09	396.38	476.42	493.52	3.59	152.72	12.31
2019年				0.2					0.1	33.8	201.4	187.1	219.8	109.1	25.1	114.6	347.7	174.9	72.2	77.3	1.8	47.5	387	464.4	480.9	2.4	145.2	12.3
2018年			0	0.13					0.11	33.74	200.5	176.32	210.89	103.55	23.14	115.67	321.5	164.99	63.39	71.73	1.95	42.35	375.4	465.84	466.58		135.89	12.11
2017年			0.04	0.15						33.71	198.53	165.44	207.11	104.37	20.67	115.76	283.31	155.82	58.42	74.69	2.07	39.94	356.28	456.22	437.86		126.57	11.75
2016年			0.04	0.15						33.78	196.98	160.82	204.43	93.28	21.4	118.29	267.53	143.46	56.4	70.34	1.65	39.53	341.68	420.78	422.06	0.69	118.03	11.45
2015年				0.05						33.77	194.54	167.9	207.7	85.06	21.01	114	261.5	135.23	52.05	67.7	1.41	39.86	319.03	402.53	413.52	0.55	112.16	11.27
2014年				0.05						34.28	195.63	166.56	205.94	78.1	19.62	105.47	251.03	130.97	50.88	66.1	1.34	37.44	307.09	356.41	399.68	0.47	108.29	10.62
2013年				0.05						33.98	184.03	155.32	201.03	72.59	18.83	97.69	246.91	118.25	46.34	62.1	1.3	35.38	287.63	303.68	392.25	0.2	99.31	10.2
2012年				0.05						34.04	183.03	149.69	195.65	65.49	17.83	87.63	225.45	111.03	43.53	55.01	1.06	34.31	270.83	244.92	382.74	0.16	89.16	9.72
2011年				0.04						32.25	181.96	138	190.61	58.99	17.28	78.52	215.67	104.18	42.48	53.31	1.11	33.66	246.74	192.07	374.35	0.16	84.53	9.59
2010年				0.03						32.36	177.93	133.53	185.24	56.77	16.3	65.15	195.08	98.27	41.84	49.6	1.22	31.12	229.58	164.25	363.32	0.22	80.64	9.38
2009年				0.02						31.36	175.93	128.83	183.14	50.82	15.56	59.8	192.16	91.24	38.43	49.2	1.01	28.64	215.69	130.44	351.41	0.06	74.84	11.72
注：根据第三次全国农业普查结果，对2007年-2017年农业生产有关数据进行了修正。
数据来源：国家统计局

## Sheet: 果园面积
数据库：分省年度数据
指标：果园面积(千公顷)
时间：最近20年
时间	北京市	天津市	河北省	山西省	内蒙古自治区	辽宁省	吉林省	黑龙江省	上海市	江苏省	浙江省	安徽省	福建省	江西省	山东省	河南省	湖北省	湖南省	广东省	广西壮族自治区	海南省	重庆市	四川省	贵州省	云南省	西藏自治区	陕西省	甘肃省	青海省	宁夏回族自治区	新疆维吾尔自治区
2023年	28.41	14.3	460.5	380.27	99.52	340.36	28.3	44.84	10.76	180	291.72	165.51	383.78	440.4	604.98	386.72	413.71	588.63	1094.88	1406.02	208.29	373.85	886.94	720.21	767.81	7.44	1163.7	331.33	2.65	96.11	816.1
2022年	32.59	18.94	473.74	383.94	99.46	339.79	28.74	44.77	11.62	185.37	292.48	167.62	377.09	438.7	606.67	401.86	411.74	578.79	1069.12	1405.35	204.58	366.18	857.15	772.76	746.93	5.61	1168.15	332.23	6.31	104.16	1077.1
2021年	39.55	22.41	472.49	387.66	104.63	347.04	28.71	45	12.59	190.65	301.24	168.49	368.36	427.32	610.55	404.22	410.3	568.61	1050.76	1389.32	191.01	355.12	837.45	802.14	708.41	5.15	1169.7	328.3	6.72	104.04	950.05
2020年	42.5	24	521.61	381.05	98.34	358.38	27.11	41.14	13.13	190.84	318.85	166.29	355.78	427.84	603.19	452.21	400.83	556.14	1031.31	1352.57	178.36	347.77	806.89	779.47	665.16	4.2	1154.48	326.66	7.23	104.69	908.24
2019年	43.84	26.57	506.02	374.86	97.49	352.74	26.49	29.71	13.42	199.52	321.52	160.27	344.08	420.09	585.34	432.28	380.86	535.93	1007	1331.88	171.45	321.35	776.55	684.5	628.44	5.36	1134.16	318.99	7.59	102.98	935.4
2018年	46.41	28.64	529.73	363.27	83.15	352.06	24.65	20.42	14.54	204.54	323.48	141.97	331.79	411.67	574.74	434.07	366.17	516.96	982.33	1263.63	170.72	307.43	744.45	580.26	599.78		1113.92	313.65	7.4	92.36	930.67
2017年	47.71	31.46	560.03	359.53	59.78	350.69	18.61	27.2	12.7	209.15	325.71	138.02	310.45	396.92	579.41	442.67	345.82	500.74	960.52	1174.42	165.32	290.3	693.71	406.35	570.01	0	1086.88	303.33	6.24	79.59	695.36
2016年	52.51	33.62	553.04	357.35	60.35	359.14	18.1	32.28	13.84	209.97	327.65	128.61	304.52	401.07	588.69	449.55	338.84	494.64	949.32	1106.78	158.05	272.07	659.65	332.75	548.92	4.71	1065.66	311.37	6.2	84.63	692.77
2015年	57.14	33.35	594.09	359.54	52.73	413.19	20.49	33.93	15.92	209.42	332.53	128.08	324.94	414.7	591.08	457.47	338.28	496.85	968.47	1057.88	160.23	295.54	638.53	307.65	472.29	3.21	1062.56	302	8.57	89.74	971.78
2014年	57.52	32.96	650.17	354.9	50.59	402.78	24.83	34.71	17.34	214.29	330.09	124.2	337.41	414.5	590.43	460.05	354.15	529.71	971.78	999.17	163.59	311.25	618.48	267.7	431.67	2.12	1060.39	300.84	7.68	95.22	1397.15
2013年	60.18	34.15	661.34	346.47	62.5	391.76	27.2	34.24	18.39	222.05	321.4	118.22	362.1	405.2	582.77	477.19	345.27	533.82	985.12	964.01	169.49	288.64	603.79	232.37	406.53	1.97	1050.28	297.45	6.85	98.61	933.98
2012年	62.47	33.71	699.97	336.89	50.83	389.94	30.51	35.33	18.98	209.83	321.45	116.47	381.64	392.84	568.8	467.96	350.59	520.94	985.95	934.85	178.4	271.11	588.37	196.04	392.49	2.02	1037.2	294.28	6.84	97.86	1015.15
2011年	63.46	32.55	745.99	320.71	49.39	350.37	34.48	34.98	18.95	202.98	320.86	110.01	398.26	381.6	566.62	466.57	356.79	516.55	999.69	919.16	178.37	250.9	570.4	171.27	348.48	2.15	1019.61	283.13	5.05	98.42	990.31
2010年	64.93	34.36	811.36	291.07	52.38	344.61	40.2	36.15	21.42	191.51	320.92	107.13	425.82	373.62	558.4	456.08	343.72	503.65	1007.07	898.53	173.59	232.37	549.15	153.46	315.19	0.38	1001.9	276.51	5.09	98.73	991.72
2009年	66.71	33.01	844.82	286.52	41.25	345.17	43.59	35.34	23.24	192.74	318.05	104.5	452.66	374.55	566.03	449.63	343.83	499.07	1022.48	888.55	169.94	212.74	534.44	141.97	309.4	1.54	950.93	270.98	4.51	86.92	839.29
注：根据第三次全国农业普查结果，对2007年-2017年农业生产有关数据进行了修正。
数据来源：国家统计局

## Sheet: 种植业汇总数据
year	农作物总播种面积(千公顷)	园地面积(千公顷)	粮食*总氮排污系数	粮食（公顷）*总氮排污系数	园区*总氮排污系数	园区*总磷排污系数	氮q/q0	磷q/q0	粮食TN	粮食TP
2009	316.76	66.71	262911	19955.9	105202	2668.4	0.703322	0.755483	258.902	17.0923
2010	313.62	64.93	260305	19758.1	102395	2597.2	0.697171	0.722023	252.863	16.141
2011	298.62	63.46	247855	18813.1	100076	2538.4	0.722599	0.758291	251.414	16.1906
2012	278.03	62.47	230765	17515.9	98515.2	2498.8	0.742915	0.721897	244.627	14.4485
2013	237.29	60.18	196951	14949.3	94903.9	2407.2	0.796697	0.802462	232.52	13.9279
2014	194.64	57.52	161551	12262.3	90709	2300.8	0.878069	0.885757	221.502	12.8994
2015	172.14	57.14	142876	10844.8	90109.8	2285.6	0.896698	0.896895	208.918	11.7766
2016	145.55	52.51	120806	9169.65	82808.3	2100.4	0.959928	0.954671	195.456	10.7592
2017	120.94	47.71	100380	7619.22	75238.7	1908.4	1	1	175.619	9.52762
2018	103.79	46.41	86145.7	6538.77	73188.6	1856.4	0.926057	0.991691	147.553	8.32542
2019	88.55	43.84	73496.5	5578.65	69135.7	1753.6	0.808687	0.988013	115.345	7.24435
2020	98.18	42.5	81489.4	6185.34	67022.5	1700	0.703434	0.838685	104.468	6.61332
2021	117.85	39.55	97815.5	7424.55	62370.3	1582	0.564421	0.676868	90.4122	6.09625
2022	143.81	32.59	119362	9060.03	51394.4	1303.6	0.451468	0.590469	77.0913	6.1194
2023	158.98	28.41	131953	10015.7	44802.6	1136.4	0.380362	0.485569	67.2313	5.41513
2009	440.31	33.01	477736	39627.9	46610.1	528.16	1.87258	1.73487	981.881	69.6657
2010	438.78	34.36	476076	39490.2	48516.3	549.76	1.79273	1.69281	940.453	67.7799
2011	442.45	32.55	480058	39820.5	45960.6	520.8	1.70873	1.69612	898.824	68.4236
2012	448.98	33.71	487143	40408.2	47598.5	539.36	1.64685	1.70565	880.641	69.8421
2013	441.34	34.15	478854	39720.6	48219.8	546.4	1.68591	1.6395	888.598	66.0177
2014	443.01	32.96	480666	39870.9	46539.5	527.36	1.591	1.51634	838.782	61.2577
2015	433.28	33.35	470109	38995.2	47090.2	533.6	1.53772	1.40422	795.305	55.507
2016	443.66	33.62	481371	39929.4	47471.4	537.92	1.34737	1.25456	712.546	50.7686
2017	439.52	31.46	476879	39556.8	44421.5	503.36	1	1	521.301	40.0602
2018	429.27	28.64	465758	38634.3	40439.7	458.24	0.872077	0.894216	441.444	34.9572
2019	410.27	26.57	445143	36924.3	37516.8	425.12	0.85898	0.893525	414.595	33.3726
2020	419.17	24	454799	37725.3	33888	384	0.780463	0.860817	381.402	32.8051
2021	437	22.41	474145	39330	31642.9	358.56	0.733403	0.781775	370.946	31.0275
2022	443.51	18.94	481208	39915.9	26743.3	303.04	0.697151	0.696732	354.119	28.0218
2023	453.1	14.34	491614	40779	20248.1	229.44	0.654513	0.639626	335.02	26.2301
2009	8416.08	844.82	6522462	563877	1.2233e+06	30413.5	1.08635	1.08069	8414.6	642.242
2010	8260.75	811.36	6.40208e+06	553470	1.17485e+06	29209	1.10707	1.09845	8388.16	640.046
2011	8278.32	745.99	6415698	554647	1.08019e+06	26855.6	1.10002	1.09126	8245.67	634.569
2012	8361.89	699.97	6.48046e+06	560247	1.01356e+06	25198.9	1.08374	1.06842	8121.6	625.503
2013	8416.01	661.34	6.52241e+06	563873	957620	23808.2	1.06946	1.06087	7999.61	623.452
2014	8454.9	650.17	6.55255e+06	566478	941446	23406.1	1.06461	1.06484	7978.21	628.13
2015	8457.76	594.09	6554764	566670	860242	21387.2	1.04511	1.05132	7749.5	618.238
2016	8467.51	553.08	6.56232e+06	567323	800860	19910.9	1.02274	1.02316	7530.62	600.833
2017	8381.65	560.07	6.49578e+06	561571	810981	20162.5	1	1	7306.76	581.733
2018	8197.13	529.73	6.35278e+06	549208	767049	19070.3	0.83432	0.560158	5940.21	318.325
2019	8132.69	506.02	6.30283e+06	544890	732717	18216.7	0.782307	0.551154	5503.96	310.358
2020	8089.44	521.62	6269316	541992	755306	18778.3	0.743063	0.528256	5219.73	296.231
2021	8097.2	472.51	6275330	542512	684194	17010.4	0.708778	0.521828	4932.76	291.975
2022	8113.99	473.77	6.28834e+06	543637	686019	17055.7	0.68051	0.509402	4746.12	285.618
2023	8098.23	460.52	6.27613e+06	542581	666833	16578.7	0.647381	0.45971	4494.74	257.051
2009	3561.48	286.54	3.09136e+06	217250	624944	12321.2	1.37651	1.44895	5115.55	332.637
2010	3638.11	291.1	3.15788e+06	221925	634889	12517.3	1.39456	1.50019	5289.26	351.707
2011	3694.41	320.75	3.20675e+06	225359	699556	13792.2	1.34895	1.42857	5269.4	341.645
2012	3696.23	336.94	3.20833e+06	225470	734866	14488.4	1.33799	1.41015	5275.97	338.378
2013	3667.89	346.52	3.18373e+06	223741	755760	14900.4	1.32656	1.38906	5225.96	331.486
2014	3664.57	354.95	3.18085e+06	223539	774146	15262.9	1.24093	1.30319	4907.85	311.203
2015	3612.65	359.59	3.13578e+06	220372	784266	15462.4	1.17664	1.21012	4612.5	285.387
2016	3591.54	357.5	3.11746e+06	219084	779708	15372.5	1.11543	1.12453	4347.03	263.654
2017	3577.62	359.68	3.10537e+06	218235	784462	15466.2	1	1	3889.84	233.701
2018	3555.16	363.4	3.08588e+06	216865	792575	15626.2	0.901835	0.888108	3497.72	206.477
2019	3524.42	375.06	3.0592e+06	214990	818006	16127.6	0.813299	0.792099	3153.32	183.068
2020	3541.51	381.85	3.07403e+06	216032	832815	16419.5	0.749593	0.72355	2928.54	168.19
2021	3587.95	388.79	3.11434e+06	218865	847951	16718	0.69537	0.673114	2755.26	158.574
2022	3611.59	385.27	3.13486e+06	220307	840274	16566.6	0.647642	0.617327	2574.46	146.228
2023	3641.72	381.23	3.16101e+06	222145	831463	16392.9	0.617567	0.586741	2465.62	139.96
2009	6895.77	41.25	813701	103437	8456.25	412.5	1.10158	0.869172	905.676	90.2626
2010	7362.07	52.38	868724	110431	10737.9	523.8	1.03904	0.868676	913.797	96.3838
2011	7539.51	49.39	889662	113093	10125	493.9	1.02051	0.824067	918.244	93.6029
2012	7670.84	50.83	905159	115063	10420.1	508.3	1.02633	0.861779	939.689	99.5965
2013	7823.05	62.5	923120	117346	12812.5	625	1.07743	0.925728	1008.4	109.209
2014	8079.08	50.59	953331	121186	10371	505.9	1.1428	0.990694	1101.32	120.56
2015	8423.68	52.73	993994	126355	10809.6	527.3	1.11332	1.01751	1118.66	129.104
2016	8957.21	60.35	1.05695e+06	134358	12371.8	603.5	1.04435	0.991572	1116.75	133.824
2017	9014.22	59.78	1.06368e+06	135213	12254.9	597.8	1	1	1075.93	135.811
2018	8824.07	83.15	1.04124e+06	132361	17045.8	831.5	0.927849	0.957966	981.929	127.594
2019	8885.02	97.49	1.04843e+06	133275	19985.5	974.9	0.892711	0.896636	953.788	120.374
2020	8882.81	98.34	1.04817e+06	133242	20159.7	983.4	0.824995	0.83999	881.368	112.748
2021	8743.34	104.63	1.03171e+06	131150	21449.2	1046.3	0.951742	1.10699	1002.34	146.34
2022	8750.68	99.46	1.03258e+06	131260	20389.3	994.6	0.823116	0.479806	866.716	63.4567
2023	8808.87	99.52	1.03945e+06	132133	20401.6	995.2	0.761361	0.353247	806.927	47.0272
2009	3810.64	345.17	2.80463e+06	236260	2.23187e+06	132200	1.28397	1.28267	6466.71	472.614
2010	3950.14	344.61	2.9073e+06	244909	2.22825e+06	131986	1.26757	1.20473	6509.67	454.056
2011	3997.53	350.37	2.94218e+06	247847	2.26549e+06	134192	1.27839	1.26433	6657.45	483.024
2012	4095.55	389.94	3.01432e+06	253924	2.52135e+06	149347	1.22185	1.24017	6763.76	500.123
2013	4154.41	391.76	3.05765e+06	257573	2.53312e+06	150044	1.23629	1.2246	6911.82	499.168
2014	4219.8	402.78	3.10577e+06	261628	2.60438e+06	154265	1.18014	1.19675	6738.78	497.719
2015	4335.47	413.19	3.19091e+06	268799	2.67169e+06	158252	1.10842	1.12836	6498.23	481.867
2016	4242.73	359.14	3.12265e+06	263049	2.3222e+06	137551	1.0449	1.054	5689.32	422.231
2017	4172.32	350.69	3.07083e+06	258684	2.26756e+06	134314	1	1	5338.39	392.998
2018	4207.11	352.06	3.09643e+06	260841	2.27642e+06	134839	0.955148	0.986787	5131.87	390.452
2019	4217.1	352.74	3.10379e+06	261460	2.28082e+06	135099	0.889974	0.94006	4792.16	372.79
2020	4287.78	358.38	3.15581e+06	265842	2.31729e+06	137260	0.806592	0.887698	4414.55	357.833
2021	4328.94	347.04	3.1861e+06	268394	2.24396e+06	132916	0.741361	0.83025	4025.64	333.188
2022	4326.86	339.79	3.18457e+06	268265	2.19708e+06	130140	0.688363	0.757583	3704.53	301.825
2023	4361.42	340.37	3.21001e+06	270408	2.20083e+06	130362	0.667953	0.742996	3614.18	297.77
2009	5091.09	43.59	2.70846e+06	76366.4	217427	12902.6	1.23419	1.21191	3611.1	108.186
2010	5258.93	40.2	2.79775e+06	78883.9	200518	11899.2	1.22333	1.17323	3667.87	106.51
2011	5297.23	34.48	2.81813e+06	79458.4	171986	10206.1	1.25969	1.19813	3766.63	107.43
2012	5431.98	30.51	2.88981e+06	81479.7	152184	9030.96	1.2566	1.19411	3822.57	108.079
2013	5632.95	27.2	2.99673e+06	84494.2	135674	8051.2	1.21996	1.16968	3821.41	108.248
2014	5890.5	24.83	3133746	88357.5	123852	7349.68	1.14948	1.13117	3744.53	108.261
2015	5997.91	20.49	3.19089e+06	89968.6	102204	6065.04	1.1074	1.08609	3646.79	104.301
2016	6063.25	18.1	3225649	90948.8	90282.8	5357.6	1.06073	1.06671	3517.31	102.731
2017	6086.2	18.61	3.23786e+06	91293	92826.7	5508.56	1	1	3330.69	96.8016
2018	6080.89	24.65	3.23503e+06	91213.4	122954	7296.4	0.92353	0.962614	3101.2	94.8268
2019	6117.05	26.49	3.25427e+06	91755.8	132132	7841.04	0.83804	0.893027	2837.94	88.9426
2020	6150.99	27.11	3.27233e+06	92264.9	135225	8024.56	0.784944	0.859353	2674.74	86.184
2021	6187.06	28.71	3.29152e+06	92805.9	143205	8498.16	0.665022	0.756575	2284.17	76.6441
2022	6226.36	28.74	3.31242e+06	93395.4	143355	8507.04	0.631939	0.724896	2183.84	73.8687
2023	6292.47	28.3	3.34759e+06	94387.1	141160	8376.8	0.577458	0.712844	2014.61	73.2546
2009	12840.7	35.34	1.32002e+07	1.33543e+06	91459.9	5371.68	0.972003	0.960429	12919.5	1287.74
2010	13347.6	36.15	1.37214e+07	1.38816e+06	93556.2	5494.8	1.0015	0.997384	13835.7	1390.01
2011	13749.6	34.98	1.41346e+07	1.42996e+06	90528.2	5316.96	1.02942	1.00234	14643.6	1438.63
2012	13929.7	35.33	1.43197e+07	1.44869e+06	91434	5370.16	1.06673	1.0293	15372.8	1496.67
2013	14212	34.24	1.46099e+07	1.47805e+06	88613.1	5204.48	1.05527	1.00491	15510.9	1490.53
2014	14497.7	34.71	1.49036e+07	1.50776e+06	89829.5	5275.92	1.06034	1.01532	15898.1	1536.22
2015	14811.9	33.93	1.52266e+07	1.54044e+06	87810.8	5157.36	1.03213	0.988098	15806.5	1527.2
2016	14829.5	32.28	1.52447e+07	1.54226e+06	83540.6	4906.56	1.01506	0.960222	15559	1485.63
2017	14767.6	27.2	1.51811e+07	1.53583e+06	70393.6	4134.4	1	1	15251.5	1539.96
2018	14673.3	20.42	1.50842e+07	1.52603e+06	52847	3103.84	0.984164	0.947087	14897.3	1448.22
2019	14770.1	29.71	1.51836e+07	1.53609e+06	76889.5	4515.92	0.853806	0.83801	13029.5	1291.04
2020	14910.1	41.14	1.53276e+07	1.55065e+06	106470	6253.28	0.833847	0.848222	12869.7	1320.6
2021	15065	45	1.54869e+07	1.56676e+06	116460	6840	0.87116	0.8876	13593	1396.73
2022	15209.4	44.77	1.56353e+07	1.58178e+06	115865	6805.04	0.86505	0.874188	13625.5	1388.72
2023	15304.2	44.84	1.57327e+07	1.59164e+06	116046	6815.68	0.862852	0.868589	13675.2	1388.4
2009	415.4	23.24	2515247	318612	255315	4159.96	1.00672	1.19753	2789.17	386.53
2010	415.58	21.42	2.51634e+06	318750	235320	3834.18	0.982474	1.17377	2703.43	378.64
2011	420.03	18.95	2.54328e+06	322163	208185	3392.05	1.00661	0.931368	2769.66	303.212
2012	401.64	18.98	2.43193e+06	308058	208514	3397.42	0.881906	0.961988	2328.62	299.616
2013	391.3	18.39	2.36932e+06	300127	202033	3291.81	0.888353	1.02444	2284.27	310.833
2014	369.91	17.34	2.23981e+06	283721	190497	3103.86	0.914758	1.01839	2223.14	292.1
2015	350.64	15.92	2.12313e+06	268941	174897	2849.68	0.936813	1.00549	2152.82	273.283
2016	303.78	13.84	1.83939e+06	232999	152046	2477.36	1.00315	1.01751	1997.72	239.599
2017	284.95	12.7	1.72537e+06	218557	139522	2273.3	1	1	1864.89	220.83
2018	282.27	14.65	1.70914e+06	216501	160945	2622.35	0.876297	0.941054	1638.75	206.207
2019	261.39	13.52	1.58272e+06	200486	148531	2420.08	0.789842	0.812981	1367.41	164.959
2020	255.16	13.25	1.54499e+06	195708	145564	2371.75	0.721235	0.662479	1219.29	131.223
2021	264.35	12.76	1.60064e+06	202756	140181	2284.04	0.636276	0.602908	1107.64	123.621
2022	269.17	11.76	1.62982e+06	206453	129195	2105.04	0.593026	0.556227	1043.14	116.006
2023	273.2	10.92	1654226	209544	119967	1954.68	0.584278	0.530343	1036.62	112.167
2009	7407.98	224.1	4.80333e+07	5.19299e+06	1.49676e+06	38321.1	1.22484	1.32948	60666.3	6954.93
2010	7462.35	223.87	4.83859e+07	5.23111e+06	1.49523e+06	38281.8	1.20106	1.31264	59910.3	6916.83
2011	7508.44	235.23	4.86847e+07	5.26342e+06	1.5711e+06	40224.3	1.15652	1.29857	58121.9	6887.17
2012	7569.22	243.87	4.90788e+07	5.30602e+06	1.62881e+06	41701.8	1.11591	1.25154	56584.9	6692.91
2013	7597.93	256.03	4.9265e+07	5.32615e+06	1.71002e+06	43781.1	1.08849	1.20603	55486	6476.29
2014	7615.79	248.57	4.93808e+07	5.33867e+06	1.6602e+06	42505.5	1.07447	1.16736	54842	6281.77
2015	7693.7	243.19	4.9886e+07	5.39328e+06	1.62427e+06	41585.5	1.05152	1.12966	54164	6139.58
2016	7639.9	243.75	4.95371e+07	5.35557e+06	1.62801e+06	41681.2	1.03357	1.09813	52882.8	5926.89
2017	7556.4	242.86	4.89957e+07	5.29704e+06	1.62206e+06	41529.1	1	1	50617.8	5338.57
2018	7520.23	238.28	4.87612e+07	5.27168e+06	1.59147e+06	40745.9	0.966505	0.927034	48666.1	4924.8
2019	7442.63	233.32	4.8258e+07	5.21728e+06	1.55834e+06	39897.7	0.946532	0.889547	47152.8	4676.51
2020	7478.4	225.08	4.84899e+07	5.24236e+06	1.50331e+06	38488.7	0.915235	0.852911	45755.6	4504.09
2021	7514.45	224.86	4.87237e+07	5.26763e+06	1.50184e+06	38451.1	0.872311	0.723189	43812.3	3837.3
2022	7534.24	219.27	4.8852e+07	5.2815e+06	1.4645e+06	37495.2	0.840666	0.662726	42299.4	3525.04
2023	7589.96	213.97	4.92133e+07	5.32056e+06	1.42911e+06	36588.9	0.81976	0.62298	41514.6	3337.4
2009	2444.08	493.98	3.67125e+07	5.97578e+06	5.01242e+06	306268	1.00859	1.03708	42083.3	6515.01
2010	2322.55	498.85	3.4887e+07	5.67863e+06	5.06183e+06	309287	1.04387	1.09318	41701.3	6545.86
2011	2267.84	502.82	3.40652e+07	5.54487e+06	5.10211e+06	311748	1.05011	1.11113	41130.1	6507.48
2012	2095.67	504.48	3.14791e+07	5.12391e+06	5.11896e+06	312778	1.12889	1.18926	41315.2	6465.64
2013	2062.45	505.43	3.09801e+07	5.04269e+06	5.1286e+06	313367	1.12984	1.17756	40796.8	6307.09
2014	1986.77	525.72	2.98433e+07	4.85765e+06	5.33448e+06	325946	1.10733	1.13808	38953.2	5899.33
2015	1977.8	527.07	2.97085e+07	4835721	5.34818e+06	326783	1.08013	1.08854	37865.7	5619.61
2016	1946.46	524.63	2.92378e+07	4.75909e+06	5.32342e+06	325271	1.04841	1.05812	36234.2	5379.88
2017	1981.11	524.24	2.97583e+07	4.84381e+06	5.31946e+06	325029	1	1	35077.7	5168.84
2018	1978.68	523.98	2.97218e+07	4.83787e+06	5.31683e+06	324868	0.937047	0.92083	32832.8	4754
2019	1999.62	522.92	3.00363e+07	4.88907e+06	5.30607e+06	324210	0.818229	0.83057	28918.2	4329.99
2020	2014.5	525.45	3.02598e+07	4.92545e+06	5.33174e+06	325779	0.676477	0.681238	24076.9	3577.34
2021	2014.59	507.4	3.02612e+07	4.92567e+06	5.14859e+06	314588	0.544413	0.413778	19277.5	2168.31
2022	2027.16	501.21	3.045e+07	4.95641e+06	5.08578e+06	310750	0.495476	0.370405	17607.1	1950.98
2023	2041.38	502.41	3.06636e+07	4.99117e+06	5.09795e+06	311494	0.464878	0.333536	16624.8	1768.63
2009	9344.68	233.33	5.06014e+07	5.36385e+06	1.30081e+06	71865.6	1.03666	1.06056	53805	5764.87
2010	9386.19	240.66	5.08262e+07	5.38767e+06	1.34168e+06	74123.3	1.03484	1.03259	53985.7	5639.81
2011	9392.44	248.01	5.08601e+07	5.39126e+06	1.38266e+06	76387.1	1.05463	1.03593	55096.7	5664.08
2012	9336.3	266.16	5.05561e+07	5.35904e+06	1483842	81977.3	1.05837	1.05458	55077.6	5737.96
2013	9364.9	273.54	5.07109e+07	5.37545e+06	1.52499e+06	84250.3	1.04996	1.024	54845.7	5590.73
2014	9500.18	290.76	5.14435e+07	5.4531e+06	1620987	89554.1	1.01741	1.01424	53988.5	5621.6
2015	9598.29	295.98	5.19747e+07	5.50942e+06	1.65009e+06	91161.8	0.970827	0.957236	52060.4	5361.07
2016	8790.1	289.43	4.75984e+07	5.04552e+06	1.61357e+06	89144.4	1.03328	0.984195	50850	5053.51
2017	8726.68	303.46	4.7255e+07	5.00911e+06	1.69179e+06	93465.7	1	1	48946.8	5102.58
2018	8771.11	318.29	4.74956e+07	5.03462e+06	1.77447e+06	98033.3	0.944077	0.867032	46514.7	4450.17
2019	8781.96	347.37	4.75543e+07	5.04085e+06	1.93659e+06	106990	0.867655	0.803931	42941	4138.5
2020	8817.99	361	4.77494e+07	5.06153e+06	2012575	111188	0.819907	0.761501	40800.2	3939.03
2021	8886.77	373.5	4.81219e+07	5.10101e+06	2.08226e+06	115038	0.773795	0.646059	38847.7	3369.87
2022	8933.59	376.89	4.83754e+07	5.12788e+06	2.10116e+06	116082	0.690526	0.402991	34855.4	2113.27
2023	9043.96	377.41	4.8973e+07	5.19123e+06	2.10406e+06	116242	0.62904	0.304742	32129.6	1617.41
2009	2075.31	635.8	2.32186e+07	3.01127e+06	5.45135e+06	453325	0.806485	0.770582	23121.9	2669.76
2010	1945.91	611.06	2.17708e+07	2.82352e+06	5.23923e+06	435686	0.857063	0.824725	23149.3	2687.95
2011	1878.97	588.87	2.10219e+07	2.72639e+06	5.04897e+06	419864	0.88425	0.849101	23053.2	2671.48
2012	1761.23	577.29	1.97046e+07	2.55554e+06	4.94968e+06	411608	0.936421	0.902125	23086.8	2676.74
2013	1740.96	563.13	1.94779e+07	2.52613e+06	4.82828e+06	401512	0.940501	0.905604	22859.9	2651.29
2014	1670.17	543.35	1.86859e+07	2.42342e+06	4.65868e+06	387409	0.992914	0.969897	23179.1	2726.21
2015	1617.17	532.64	1.80929e+07	2.34651e+06	4.56686e+06	379772	1.02913	1.03077	23319.8	2810.17
2016	1548.8	508.95	1.7328e+07	2.24731e+06	4.36374e+06	362881	1.07208	1.07506	23255.2	2806.1
2017	1549.34	517.56	1.7334e+07	2.24809e+06	4.43756e+06	369020	1	1	21771.6	2617.11
2018	1577.31	542.68	1.76469e+07	2.28868e+06	4.65294e+06	386931	0.92889	0.926206	20714.1	2478.16
2019	1599.29	563.88	1.78929e+07	2.32057e+06	4.83471e+06	402046	0.872218	0.875243	19823.4	2382.95
2020	1631.27	579.72	1.82506e+07	2.36697e+06	4.97052e+06	413340	0.788089	0.813681	18300.3	2262.29
2021	1651.87	600.45	1.84811e+07	2.39686e+06	5.14826e+06	428121	0.732157	0.769365	17300.4	2173.44
2022	1682.14	618.09	1.88198e+07	2.44079e+06	5.2995e+06	440698	0.67267	0.697361	16224.3	2009.43
2023	1712.25	632.25	19156653	2.48447e+06	5.42091e+06	450794	0.63799	0.671363	15680.2	1970.63
2009	5488.36	425.37	3.66732e+07	4.71999e+06	3.27067e+06	239483	1.16756	1.08896	46637.1	5400.67
2010	5505	430.39	36784410	4734300	3.30927e+06	242310	1.16645	1.10564	46767.5	5502.36
2011	5546.41	440.59	3.70611e+07	4.76991e+06	3.3877e+06	248052	1.16815	1.09888	47250.4	5514.12
2012	5596.83	458.33	3.7398e+07	4.81327e+06	3.5241e+06	258040	1.13383	1.11354	46398.8	5647.09
2013	5636.98	477.79	3.76663e+07	4.8478e+06	3.67373e+06	268996	1.12129	1.07927	46354.2	5522.4
2014	5667.34	492.6	3.78692e+07	4.87391e+06	3.7876e+06	277334	1.10406	1.08561	45991.4	5592.27
2015	5688.41	499.76	3.801e+07	4.89203e+06	3.84265e+06	281365	1.09893	1.06951	45992.9	5533.01
2016	5668.88	494.35	3.78795e+07	4.87524e+06	3.80106e+06	278319	1.07661	1.07174	44873.5	5523.28
2017	5638.46	501.29	3.76762e+07	4.84908e+06	3.85442e+06	282226	1	1	41530.6	5131.3
2018	5555.81	515.22	3.71239e+07	4.778e+06	3.96153e+06	290069	0.906463	0.912943	37242.4	4626.86
2019	5521.18	529.19	3.68925e+07	4.74821e+06	4.06894e+06	297934	0.82021	0.79618	33597	4017.64
2020	5644.37	541.04	3.77157e+07	4.85416e+06	4.16006e+06	304606	0.754327	0.730585	31588	3768.91
2021	5672.94	544.45	3.79066e+07	4.87873e+06	4.18628e+06	306525	0.734615	0.680868	30922.1	3530.47
2022	5730.55	558.72	3.82915e+07	4928273	4.296e+06	314559	0.715092	0.650996	30454	3413.06
2023	5797.01	562.49	3.87356e+07	4.98543e+06	4.32499e+06	316682	0.699236	0.635945	30109.5	3371.85
2009	10910	581.59	8.91345e+06	207290	1.19982e+06	23263.6	1.20726	1.15583	12209.3	266.481
2010	10677.4	574.7	8.72344e+06	202871	1.18561e+06	22988	1.21569	1.14675	12046.3	259.004
2011	10782.9	583.9	8.8096e+06	204874	1.20459e+06	23356	1.17411	1.13144	11757.8	258.229
2012	10862.3	586.63	8.87447e+06	206383	1.21022e+06	23465.2	1.17251	1.09854	11824.4	252.497
2013	11136.6	601.6	9.09863e+06	211596	1.2411e+06	24064	1.13366	1.07566	11721.8	253.49
2014	11316.6	610.05	9.2457e+06	215016	1.25853e+06	24402	1.08911	1.0464	11440.2	250.528
2015	11381	612.09	9.29829e+06	216239	1.26274e+06	24483.6	1.0591	1.03703	11185.2	249.638
2016	11278.6	610.09	9.21462e+06	214294	1.25862e+06	24403.6	1.03355	1.02425	10824.6	244.485
2017	11107.8	600.08	9.07506e+06	211048	1.23797e+06	24003.2	1	1	10313	235.051
2018	11076.8	597.88	9.04975e+06	210459	1.23343e+06	23915.2	0.941618	0.933655	9682.82	218.825
2019	10933.1	610.44	8.93233e+06	207729	1.25934e+06	24417.6	0.870036	0.850728	8867.12	197.493
2020	10889.1	630.36	8.89636e+06	206892	1.30043e+06	25214.4	0.835143	0.819677	8515.78	190.252
2021	10948.6	637.48	8.945e+06	208023	1.31512e+06	25499.2	0.762072	0.72464	7818.95	169.22
2022	10964.1	633.41	8.9577e+06	208319	1.30672e+06	25336.4	0.714762	0.686223	7336.63	160.339
2023	11002.7	632.14	8.98922e+06	209052	1.3041e+06	25285.6	0.6873	0.659944	7074.61	154.65
2009	14235.7	509.43	4.23654e+07	3.33115e+06	2.07389e+06	89659.7	1.12617	1.11619	50046.2	3818.29
2010	14320.8	521.23	4.26187e+07	3.35106e+06	2.12193e+06	91736.5	1.14071	1.1226	51036	3864.9
2011	14373.3	545.09	4.2775e+07	3.36336e+06	2.21906e+06	95935.8	1.14288	1.14695	51422.6	3967.64
2012	14386.9	555.59	4.28154e+07	3.36653e+06	2.26181e+06	97783.8	1.14282	1.15307	51515.2	3994.6
2013	14586.5	574.88	43409424	3413241	2.34034e+06	101179	1.11805	1.13215	51150.4	3978.85
2014	14731.5	565.52	4.38411e+07	3.44718e+06	2.30223e+06	99531.5	1.09767	1.10824	50650.3	3930.59
2015	14879.7	571.47	4.42821e+07	3.48186e+06	2.32645e+06	100579	1.07418	1.07677	50066.1	3857.46
2016	14902.7	567.84	4.43505e+07	3.48724e+06	2.31168e+06	99939.8	1.02597	1.04053	47874	3732.58
2017	14732.5	558.43	4.3844e+07	3.44741e+06	2.27337e+06	98283.7	1	1	46117.4	3545.7
2018	14783.4	549.74	4.39952e+07	3.4593e+06	2.23799e+06	96754.2	0.913614	0.888405	42239.3	3159.22
2019	14714	546.88	4.37888e+07	3.44307e+06	2.22635e+06	96250.9	0.864895	0.830894	39798.3	2940.8
2020	14688	565.21	4.37115e+07	3.43699e+06	2.30097e+06	99477	0.830951	0.793572	38234.1	2806.44
2021	14705.1	520	4.37625e+07	3.441e+06	2116920	91520	0.786261	0.749822	36073.2	2648.76
2022	14711.5	518.49	4.37815e+07	3.44249e+06	2.11077e+06	91254.2	0.717361	0.665272	32921.3	2350.9
2023	14747.1	503.51	4.38875e+07	3.45083e+06	2.04979e+06	88617.8	0.692058	0.633162	31791.3	2241.04
2009	7328.5	535.99	4.89764e+07	5.79684e+06	3.07712e+06	218684	1.30028	1.33716	67684.3	8043.7
2010	7377.94	538.8	4.93068e+07	5.83595e+06	3.09325e+06	219830	1.3152	1.30033	68916.7	7874.5
2011	7454.98	572.46	4.98216e+07	5.89689e+06	3.28649e+06	233564	1.3245	1.27691	70341.8	7828.06
2012	7684.4	576.04	5.13548e+07	6.07836e+06	3.30705e+06	235024	1.28496	1.23879	70238.2	7820.97
2013	7731.26	592.18	5.1668e+07	6.11543e+06	3.39971e+06	241609	1.22653	1.21865	67542	7746.98
2014	7791.42	605.18	5.20701e+07	6.16301e+06	3.47434e+06	246913	1.16473	1.19632	64694.3	7668.34
2015	7983.43	599.78	5.33533e+07	6.31489e+06	3.44334e+06	244710	1.07656	1.10088	61144.9	7221.33
2016	7908.5	606.37	5.28525e+07	6.25562e+06	3.48117e+06	247399	1.05114	1.089	59214.5	7081.78
2017	7956.14	629.13	5.31709e+07	6.29331e+06	3.61184e+06	256685	1	1	56782.7	6549.99
2018	7952.9	687.67	5.31492e+07	6.29074e+06	3.94791e+06	280569	0.882203	0.843452	50371.3	5542.59
2019	7815.89	728.56	5.22336e+07	6.18237e+06	4.18266e+06	297252	0.83098	0.79984	46880.8	5182.66
2020	7974.39	759.22	5.32928e+07	6.30774e+06	4.35868e+06	309762	0.788707	0.76273	45470.2	5047.37
2021	8109.24	779.38	5.41941e+07	6.41441e+06	4.47442e+06	317987	0.735343	0.714082	43141.4	4807.48
2022	8191.92	787.8	5.47466e+07	6.47981e+06	4.52276e+06	321422	0.673157	0.609147	39897.6	4142.95
2023	8309.25	796.82	5.55307e+07	6.57262e+06	4.57454e+06	325103	0.630346	0.577381	37887.1	3982.61
2009	7852.21	590.31	4.94846e+07	4.53073e+06	2.95332e+06	268001	1.17541	1.07406	61635.9	5154.14
2010	8057.99	601.92	5.07815e+07	4.64946e+06	3.01141e+06	273272	1.16374	1.05932	62600.9	5214.76
2011	8178.06	620.73	5.15381e+07	4.71874e+06	3.10551e+06	281811	1.16609	1.06486	63719.2	5324.91
2012	8299.62	631.97	5.23042e+07	4.78888e+06	3.16175e+06	286914	1.15024	1.07313	63798.9	5447
2013	8352.67	652.07	5.26385e+07	4.81949e+06	3.26231e+06	296040	1.11638	1.06823	62406.3	5464.55
2014	8398.63	660.68	5.29282e+07	4.84601e+06	3.30538e+06	299949	1.0875	1.04831	61154	5394.55
2015	8355.22	632.08	5.26546e+07	4.82096e+06	3.1623e+06	286964	1.03365	1.01399	57695.3	5179.39
2016	8341.5	638.1	52568133	4.81305e+06	3.19241e+06	289697	1.02333	1.01949	57061.5	5202.19
2017	8321.97	656.56	5.24451e+07	4.80178e+06	3.28477e+06	298078	1	1	55729.8	5099.85
2018	8111.09	681.95	5.11161e+07	4.6801e+06	3.4118e+06	309605	0.985454	1.00473	53734.7	5013.31
2019	8122.79	710.83	5.11898e+07	4.68685e+06	3.55628e+06	322717	0.876906	0.905354	48007.2	4535.43
2020	8400.13	741.91	5.29376e+07	4.84688e+06	3.71178e+06	336827	0.808297	0.849222	45789.6	4402.11
2021	8504.26	771.91	5.35938e+07	4.90696e+06	3.86187e+06	350447	0.706369	0.711103	40585	3738.56
2022	8591.54	789.26	5.41439e+07	4.95732e+06	3.94867e+06	358324	0.658047	0.648848	38227.6	3449.04
2023	8714.95	804.73	5.49216e+07	5.02853e+06	4.02606e+06	365347	0.613528	0.572944	36166	3090.39
2009	4277.45	1060.91	4.94217e+07	6.92519e+06	1.37865e+07	872068	0.950929	0.846964	60106.5	6604
2010	4262.77	1048.91	4.9252e+07	6.90142e+06	1.36306e+07	862204	0.957363	0.861501	60201.5	6688.38
2011	4244.73	1042.17	4.90436e+07	6.87222e+06	1.3543e+07	856664	0.975851	0.873613	61075.2	6752.05
2012	4248.43	1029.48	4.90864e+07	6.87821e+06	1.33781e+07	846233	0.987392	0.877677	61676.9	6779.56
2013	4178.17	1031.46	4.82746e+07	6.76446e+06	1.34038e+07	847860	0.981924	0.895298	60563.5	6815.29
2014	4225.19	1022.66	4.88178e+07	6.84058e+06	1.32895e+07	840627	0.982682	0.924952	61031.7	7104.75
2015	4194.55	1020.52	4.84638e+07	6.79098e+06	1.32617e+07	838867	1.00825	0.993198	62234.5	7577.95
2016	4181.56	1005.72	4.83137e+07	6.76995e+06	1.30693e+07	826702	1.02319	1.02243	62806.4	7767.01
2017	4227.51	1018.94	4.88447e+07	6.84434e+06	1.32411e+07	837569	1	1	62085.8	7681.91
2018	4279.36	1045.72	4.94437e+07	6.92828e+06	1.35891e+07	859582	0.845232	1.07969	53277.4	8408.46
2019	4357.38	1079.2	5.03452e+07	7.0546e+06	14024204	887102	0.807903	1.03684	52004.2	8234.23
2020	4451.81	1109.5	5.14362e+07	7.20748e+06	1.4418e+07	912009	0.770967	0.989903	50771.4	8037.5
2021	4498.36	1140.03	5.19741e+07	7.28284e+06	1.48147e+07	937105	0.72625	0.986494	48505.3	8108.93
2022	4553.47	1168.58	5.26108e+07	7.37207e+06	1.51857e+07	960573	0.70133	0.94492	47547.7	7873.68
2023	4587.27	1207.54	5.30013e+07	7.42679e+06	1.5692e+07	992598	0.687178	0.923436	47204.5	7774.77
2009	5964.99	937.75	6.8156e+07	8.51801e+06	1.24439e+07	822407	0.900119	0.902738	72549.5	8431.95
2010	5896.37	948.13	6.73719e+07	8.42002e+06	1.25817e+07	831510	0.931368	0.94164	74466.3	8711.61
2011	5899.88	972.47	6.7412e+07	8.42503e+06	1.29047e+07	852856	0.942526	0.964566	75700.6	8949.13
2012	6036.16	989.86	6.89692e+07	8.61964e+06	1.31354e+07	868107	0.94245	0.971165	77379.5	9214.16
2013	6076.46	1026.11	6.94296e+07	8.67718e+06	1.36165e+07	899898	0.958425	0.978976	79593.5	9375.74
2014	5855.03	1065.27	6.68996e+07	8.36098e+06	1.41361e+07	934242	1.00111	1.02718	81125.6	9547.83
2015	6078.81	1125.58	6.94565e+07	8.68054e+06	1.49364e+07	987134	0.95883	0.983347	80918.5	9506.68
2016	5966.74	1177.12	6.8176e+07	8.5205e+06	1.56204e+07	1.03233e+06	0.985524	1.00407	82583.3	9591.76
2017	5969.88	1249.11	6.82118e+07	8.52499e+06	1.65757e+07	1.09547e+06	1	1	84787.5	9620.46
2018	5972.38	1335.36	6.82404e+07	8.52856e+06	1.77202e+07	1.17111e+06	0.970395	0.965746	83415.7	9367.42
2019	5989.21	1409.18	6.84327e+07	8.55259e+06	1.86998e+07	1.23585e+06	0.954689	0.947609	83184.4	9275.61
2020	6107.32	1443.85	6.97822e+07	8.72125e+06	1.91599e+07	1.26626e+06	0.915141	0.899977	81394.6	8988.53
2021	6177.52	1485.39	7.05843e+07	8.8215e+06	1.97111e+07	1.30269e+06	0.866864	0.860465	78273.9	8711.51
2022	6271.4	1507.86	7.1657e+07	8.95556e+06	2.00093e+07	1.32239e+06	0.822461	0.821193	75392	8440.19
2023	6352.35	1513.25	7.2582e+07	9.07116e+06	2.00808e+07	1.32712e+06	0.796653	0.805881	73820.1	8379.78
2009	800.44	170.95	9.01696e+06	1.20706e+06	1.57462e+06	97954.4	0.789541	0.815721	8362.49	1064.53
2010	786.75	174.81	8.86274e+06	1186419	1.61017e+06	100166	0.796909	0.816615	8345.96	1050.65
2011	782.4	179.48	8813736	1.17986e+06	1.65319e+06	102842	0.805999	0.837204	8436.33	1073.88
2012	786.57	179.46	8.86071e+06	1.18615e+06	1.65301e+06	102831	0.829531	0.846069	8721.46	1090.56
2013	772.48	170.79	8.70199e+06	1.1649e+06	1.57315e+06	97862.7	0.847021	0.929229	8703.26	1173.4
2014	779.4	164.93	8779941	1.17534e+06	1.51917e+06	94504.9	0.859962	1.05255	8856.85	1336.57
2015	757.5	161.64	8.53324e+06	1142310	1.48887e+06	92619.7	0.918509	1.11889	9205.39	1381.75
2016	731.9	159.7	8.24485e+06	1.10371e+06	1.471e+06	91508.1	0.964332	0.946438	9369.31	1131.2
2017	709.44	167.39	7.99184e+06	1.06984e+06	1.54183e+06	95914.5	1	1	9533.67	1165.75
2018	712.94	172.67	8.03127e+06	1.07511e+06	1.59046e+06	98939.9	0.946519	0.921706	9107.15	1082.13
2019	676.24	173.25	7.61784e+06	1.01977e+06	1.59581e+06	99272.2	0.93455	0.925308	8610.62	1035.46
2020	676.86	180.56	7.62483e+06	1.0207e+06	1.66314e+06	103461	0.788962	0.865715	7327.85	973.208
2021	684.78	193.34	7.71405e+06	1.03265e+06	1.78085e+06	110784	0.728602	0.81903	6918	936.505
2022	687.18	206.92	7.74108e+06	1.03627e+06	1.90594e+06	118565	0.676327	0.78267	6524.54	903.853
2023	702.36	210.9	7.91209e+06	1.05916e+06	1.9426e+06	120846	0.631868	0.715101	6226.86	843.823
2009	3110.74	241.38	1.11956e+07	1.23807e+06	514864	77483	1.14367	1.09765	13392.9	1444.03
2010	3129.85	263.49	1.12643e+07	1.24568e+06	562024	84580.3	1.11542	1.1023	13191.4	1466.34
2011	3225.78	284.56	1.16096e+07	1.28386e+06	606966	91343.8	1.09762	1.1007	13409.1	1513.69
2012	3320.31	305.42	1.19498e+07	1.32148e+06	651461	98039.8	1.06359	1.09372	13402.6	1552.57
2013	3318.49	324.02	1.19432e+07	1.32076e+06	691135	104010	1.06012	1.06579	13394	1518.51
2014	3288.58	348.69	1.18356e+07	1.30885e+06	743756	111929	1.07407	1.07428	13511.1	1526.33
2015	3311.32	335.4	1.19174e+07	1.31791e+06	715408	107663	1.06178	1.06274	13413.3	1515.01
2016	3333.1	311.6	1.19958e+07	1.32657e+06	664643	100024	1.02786	1.02739	13013.2	1465.67
2017	3339.56	330.24	1.20191e+07	1.32914e+06	704402	106007	1	1	12723.5	1435.15
2018	3348.49	349.78	1.20512e+07	1.3327e+06	746081	112279	0.969629	0.974948	12408.6	1408.78
2019	3345.74	368.85	1.20413e+07	1.3316e+06	786757	118401	0.932541	0.942143	11962.7	1366.11
2020	3372.54	399.86	1.21378e+07	1.34227e+06	852901	128355	0.905603	0.91594	11764.4	1347
2021	3409.26	409.46	1.22699e+07	1.35689e+06	873378	131437	0.88401	0.894503	11618.8	1331.31
2022	3479.02	421.89	1.2521e+07	1.38465e+06	899891	135427	0.857328	0.87033	11506.1	1322.97
2023	3506.19	429.86	1.26188e+07	1.39546e+06	916891	137985	0.844423	0.856272	11429.8	1313.05
2009	9157.82	750.13	3.11549e+07	3.41587e+06	2.51969e+06	225039	1.16732	1.10169	39309.1	4011.14
2010	9158.73	778.73	3.1158e+07	3.41621e+06	2.61575e+06	233619	1.15792	1.09248	39107.2	3987.37
2011	9215.4	817.14	3.13508e+07	3.43734e+06	2.74477e+06	245142	1.14325	1.11641	38979.7	4111.16
2012	9319.58	859.2	3.17052e+07	3.4762e+06	2.88605e+06	257760	1.12336	1.10654	38858.4	4131.8
2013	9371.69	891.42	3.18825e+07	3.49564e+06	2.99428e+06	267426	1.1007	1.08977	38388.9	4100.87
2014	9377.7	925.57	3.19029e+07	3.49788e+06	3.10899e+06	277671	1.09668	1.08062	38396.9	4079.94
2015	9451.06	957.56	3.21525e+07	3.52525e+06	3.21644e+06	287268	1.07969	1.06686	38187.3	4067.42
2016	9493.82	1001.33	3.2298e+07	3.54119e+06	3.36347e+06	300399	1.05078	1.04708	37472.3	4022.44
2017	9575.05	1049.99	3.25743e+07	3.57149e+06	3.52692e+06	314997	1	1	36101.2	3886.49
2018	9615.32	1119.85	3.27113e+07	3.58651e+06	3.76158e+06	335955	0.954206	0.959047	34802.7	3761.83
2019	9692.98	1163.55	3.29755e+07	3.61548e+06	3.90836e+06	349065	0.873807	0.867105	32229.4	3437.68
2020	9849.89	1203.27	3.35093e+07	3.67401e+06	4.04178e+06	360981	0.753409	0.784814	28291.3	3166.72
2021	9999.92	1242.3	3.40197e+07	3.72997e+06	4.17289e+06	372690	0.669621	0.707214	25574.6	2901.46
2022	10227.4	1267.75	3.47935e+07	3.81481e+06	4.25837e+06	380325	0.611454	0.637654	23878.4	2675.04
2023	10264.4	1301.32	3.49195e+07	3.82862e+06	4.37113e+06	390396	0.593546	0.620904	23320.8	2619.61
2009	4802.59	272.41	1.7102e+07	2.75669e+06	597940	87716	1.18954	1.11578	21054.8	3173.74
2010	4896.93	317.71	1.7438e+07	2.81084e+06	697373	102303	1.15371	1.09026	20922.9	3176.09
2011	4998.1	363.34	1.77982e+07	2.86891e+06	797531	116995	1.23863	1.07214	23033.2	3201.3
2012	5201.03	440.96	1.85209e+07	2.98539e+06	967907	141989	1.22373	1.06822	23849	3340.73
2013	5388.73	536.05	1.91893e+07	3.09313e+06	1.17663e+06	172608	1.15764	1.02369	23576.3	3343.12
2014	5510.5	624.11	1.96229e+07	3163027	1.36992e+06	200963	1.14728	1.06191	24084.7	3572.24
2015	5532.9	710.18	1.97027e+07	3.17588e+06	1.55885e+06	228678	1.15978	1.09146	24658.7	3715.96
2016	5604.8	753.53	1.99587e+07	3.21716e+06	1.654e+06	242637	1.10411	1.08098	23862.9	3739.97
2017	5659.37	862.57	2.0153e+07	3.24848e+06	1.89334e+06	277748	1	1	22046.4	3526.23
2018	5477.16	1046.1	1.95042e+07	3.14389e+06	2.29619e+06	336844	0.889622	0.958562	19394.1	3336.5
2019	5481.56	1148.9	1.95198e+07	3.14642e+06	2.52184e+06	369946	0.795514	0.875054	17534.5	3077.01
2020	5475.35	1255.89	1.94977e+07	3.14285e+06	2.75668e+06	404397	0.722904	0.81032	16087.8	2874.41
2021	5422.88	1274.37	1.93109e+07	3.11273e+06	2.79724e+06	410347	0.692227	0.774526	15303.8	2728.72
2022	5359.45	1243.36	1.9085e+07	3.07632e+06	2.72918e+06	400362	0.69157	0.761616	15086	2647.9
2023	5344.29	1170.23	1.9031e+07	3.06762e+06	2.56865e+06	376814	0.682838	0.74994	14749.1	2583.12
2009	6381.56	660.81	4.0759e+07	3.24821e+06	2.03992e+06	221371	0.873126	0.781364	37368.9	2711.01
2010	6257.06	678.51	3.99638e+07	3.18484e+06	2.09456e+06	227301	0.937206	0.851082	39417.4	2904.02
2011	6484.91	722.83	4.14191e+07	3.30082e+06	2.23138e+06	242148	0.957317	0.894898	41787.4	3170.59
2012	6674.13	775.23	4.26277e+07	3.39713e+06	2.39314e+06	259702	0.962341	0.898002	43325.4	3283.84
2013	6848.56	798.78	4.37418e+07	3.48592e+06	2.46583e+06	267591	0.970405	0.917757	44840.1	3444.81
2014	6842.84	831.35	4.37052e+07	3.48301e+06	2.56638e+06	278502	0.995559	0.956605	46066.1	3598.28
2015	6818.64	885.81	4.35507e+07	3.47069e+06	2.7345e+06	296746	1.01673	0.992469	47059.5	3739.06
2016	6786.62	970.98	4.33461e+07	3.45439e+06	2.99742e+06	325278	1.02339	1.00957	47427.4	3815.82
2017	6790.8	1007.87	4.33728e+07	3.45652e+06	3.11129e+06	337636	1	1	46484.1	3794.15
2018	6890.77	1066.36	4.40113e+07	3.5074e+06	3.29185e+06	357231	0.916552	0.89081	43355.9	3442.65
2019	6938.86	1109.34	4.43185e+07	3.53188e+06	3.42453e+06	371629	0.853957	0.794845	40770.5	3102.69
2020	6989.67	1158.68	4.4643e+07	3.55774e+06	3.57685e+06	388158	0.812391	0.758234	39173.4	2991.91
2021	7057.24	1213.02	4.50746e+07	3.59214e+06	3.74459e+06	406362	0.737128	0.689064	35986	2755.22
2022	7130.63	1277.24	4.55433e+07	3.62949e+06	3.94284e+06	427875	0.700869	0.663837	34683.3	2693.43
2023	7218.08	1303.32	4.61019e+07	3.674e+06	4.02335e+06	436612	0.672301	0.640051	33699.2	2631
2009	214.62	1.6	37987.7	3219.3	270.4	8	1.09165	1.12681	41.7646	3.63656
2010	218.86	0.6	38738.2	3282.9	101.4	3	1.23817	1.19427	48.0902	3.92426
2011	219.04	2.31	38770.1	3285.6	390.39	11.55	0.953641	1.33827	37.345	4.41248
2012	220.24	2.18	38982.5	3303.6	368.42	10.9	1.08302	1.13133	42.6179	3.7498
2013	225.77	2.17	39961.3	3386.55	366.73	10.85	1.23153	1.33084	49.6654	4.52138
2014	227.1	2.59	40196.7	3406.5	437.71	12.95	1.2554	1.19397	51.0123	4.0827
2015	229.69	3.76	40655.1	3445.35	635.44	18.8	1.25353	1.23368	51.759	4.27365
2016	263.15	5.4	46577.6	3947.25	912.6	27	1.04587	1.11394	49.6685	4.4271
2017	254.05	0.79	44966.8	3810.75	133.51	3.95	1	1	45.1004	3.8147
2018	270.38	0.9	47857.3	4055.7	152.1	4.5	0.777783	0.849257	37.3409	3.44815
2019	271.53	7.76	48060.8	4072.95	1311.44	38.8	0.758895	0.656736	37.4684	2.70033
2020	272.08	7.79	48158.2	4081.2	1316.51	38.95	0.653613	0.556648	32.3373	2.29347
2021	274.19	9.48	48531.6	4112.85	1602.12	47.4	0.633141	0.49891	31.7417	2.07559
2022	277.24	9.08	49071.5	4158.6	1534.52	45.4	0.412359	0.396499	20.8679	1.66688
2023	281.4	11.22	49807.8	4221	1896.18	56.1	0.426326	0.41668	22.0427	1.78218
2009	4207.83	1025.77	6.2865e+06	753202	1.14373e+06	92319.3	0.935964	1.02227	6954.43	864.347
2010	4237.57	1082.54	6.33093e+06	758525	1.20703e+06	97428.6	0.933977	0.925055	7040.28	791.805
2011	4193.6	1104.14	6.26524e+06	750654	1.23112e+06	99372.6	0.9836	0.924877	7373.41	786.17
2012	4182.84	1126.36	6.24916e+06	748728	1.25589e+06	101372	1.06038	0.964263	7958.24	819.721
2013	4108.22	1149.59	6.13768e+06	735371	1.28179e+06	103463	1.08448	0.979124	8046.27	821.323
2014	4053.87	1168.68	6.05648e+06	725643	1.30308e+06	105181	1.0704	0.991713	7877.67	823.939
2015	4050	1174.72	6050700	724950	1.30981e+06	105725	1.04244	0.996967	7672.9	828.156
2016	4160.15	1183.69	6.21526e+06	744667	1.31981e+06	106532	1.00052	0.999918	7538.96	851.129
2017	4063.88	1213.45	6.07144e+06	727435	1.353e+06	109210	1	1	7424.43	836.645
2018	4091.01	1249.81	6.11197e+06	732291	1.39354e+06	112483	0.980457	0.956064	7358.83	807.658
2019	4132.09	1279.36	6.17334e+06	739644	1.42649e+06	115142	0.877955	0.918067	6672.3	784.751
2020	4160.85	1307.2	6.21631e+06	744792	1457528	117648	0.86581	0.909626	6644.09	784.498
2021	4189.27	1326.23	6.25877e+06	749879	1.47875e+06	119361	0.841078	0.900852	6507.86	783.057
2022	4212.23	1328.83	6.29307e+06	753989	1.48165e+06	119595	0.786872	0.891801	6117.71	779.063
2023	4239.94	1326.99	6.33447e+06	758949	1.47959e+06	119429	0.7648	0.834553	5976.2	733.053
2009	3693.94	282.7	1.48866e+06	107124	139371	5088.6	1.13792	1.01964	1852.57	114.416
2010	3723.47	285.89	1.50056e+06	107981	140944	5146.02	1.12151	1.07105	1840.95	121.165
2011	3774.33	292.72	1.52105e+06	109456	144311	5268.96	1.10581	1.08533	1841.58	124.514
2012	3770.7	304	1.51959e+06	109350	149872	5472	1.15943	1.09277	1935.63	125.474
2013	3779.84	307.65	1.52328e+06	109615	151671	5537.7	1.17381	1.11561	1966.07	128.466
2014	3775.83	311.46	1.52166e+06	109499	153550	5606.28	1.18585	1.18631	1986.54	136.551
2015	3768.38	313.27	1.51866e+06	109283	154442	5638.86	1.18468	1.22253	1982.1	140.495
2016	3749.2	322.82	1.51093e+06	108727	159150	5810.76	1.13202	1.17226	1890.55	134.268
2017	3752.03	315.08	1.51207e+06	108809	155334	5671.44	1	1	1667.4	114.48
2018	3773.55	325.76	1.52074e+06	109433	160600	5863.68	0.968039	0.990468	1627.6	114.198
2019	3831.57	331.29	1.54412e+06	111116	163326	5963.22	0.909418	0.942158	1552.78	110.307
2020	3931.82	338.97	1.58452e+06	114023	167112	6101.46	0.86607	0.914461	1517.04	109.849
2021	3997.94	340.57	1.61117e+06	115940	167901	6130.26	0.825035	0.860785	1467.8	105.077
2022	4061.94	344.93	1.63696e+06	117796	170050	6208.74	0.805531	0.84663	1455.6	104.986
2023	4139.59	344.26	1.66825e+06	120048	169720	6196.68	0.792814	0.811551	1457.17	102.454
2009	514.06	4.51	115664	8224.96	3738.79	117.26	1.05278	0.939664	125.704	7.83888
2010	526.75	5.09	118519	8428	4219.61	132.34	1.05124	0.620978	129.028	5.31579
2011	540.05	5.05	121511	8640.8	4186.45	131.3	1.06021	0.8874	133.266	7.78436
2012	554.21	6.84	124697	8867.36	5670.36	177.84	1.06709	0.864727	139.113	7.82163
2013	555.77	6.85	125048	8892.32	5678.65	178.1	1.08949	1.04708	142.426	9.49744
2014	553.7	7.68	124582	8859.2	6366.72	199.68	1.12756	1.16777	147.653	10.5787
2015	558.39	8.57	125638	8934.24	7104.53	222.82	1.14619	1.20564	152.147	11.0401
2016	557.75	6.2	125494	8924	5139.8	161.2	1.01813	1.0229	133.001	9.29328
2017	555.31	6.24	124945	8884.96	5172.96	162.24	1	1	130.118	9.0472
2018	557.25	7.4	125381	8916	6134.6	192.4	0.971183	0.982868	127.726	8.95235
2019	553.54	7.59	124546	8856.64	6292.11	197.34	0.74248	0.652766	97.145	5.91013
2020	571.42	7.23	128570	9142.72	5993.67	187.98	0.571005	0.379404	76.8363	3.54011
2021	583.87	6.72	131371	9341.92	5570.88	174.72	0.515843	0.325714	70.6403	3.0997
2022	586.19	6.31	131893	9379.04	5230.99	164.06	0.513801	0.311448	70.4543	2.97218
2023	598.8	2.65	134730	9580.8	2196.85	68.9	0.479404	0.27313	65.6433	2.63562
2009	1205.32	86.92	225395	19285.1	64320.8	1999.16	0.901238	0.872571	261.103	18.5721
2010	1205.86	98.73	225496	19293.8	73060.2	2270.79	0.960385	0.898151	286.729	19.3682
2011	1205.76	98.42	225477	19292.2	72830.8	2263.66	0.956133	0.917705	285.222	19.7819
2012	1176.46	97.86	219998	18823.4	72416.4	2250.78	1.00714	0.976054	294.501	20.5695
2013	1147.08	98.61	214504	18353.3	72971.4	2268.03	1.05513	1.01243	303.323	20.8776
2014	1126.76	95.22	210704	18028.2	70462.8	2190.06	1.0336	1.04227	290.614	21.0728
2015	1132.43	89.74	211764	18118.9	66407.6	2064.02	0.997871	1.04396	277.58	21.0702
2016	1118.85	84.63	209225	17901.6	62626.2	1946.49	1.01582	1.03564	276.151	20.5555
2017	1132.63	79.59	211802	18122.1	58896.6	1830.57	1	1	270.698	19.9526
2018	1164.57	92.36	217775	18633.1	68346.4	2124.28	0.917639	0.907586	262.556	18.8391
2019	1152.96	102.98	215604	18447.4	76205.2	2368.54	0.916121	0.905407	267.332	18.8469
2020	1174.23	104.69	219581	18787.7	77470.6	2407.87	0.880068	0.860114	261.426	18.2306
2021	1175.91	104.04	219895	18814.6	76989.6	2392.92	0.772776	0.869982	229.425	18.4501
2022	1189.49	104.16	222435	19031.8	77078.4	2395.68	0.749136	0.884184	224.376	18.9459
2023	1199.1	96.15	224232	19185.6	71151	2211.45	0.732243	0.833569	216.292	17.8359
2009	4036.09	839.29	904084	40360.9	416288	13428.6	0.981921	0.899023	1296.5	48.358
2010	4236.75	991.72	949032	42367.5	491893	15867.5	0.996881	0.905059	1436.43	52.7061
2011	4475.41	990.31	1.00249e+06	44754.1	491194	15845	1.02626	0.938298	1532.91	56.86
2012	4673.34	1015.15	1.04683e+06	46733.4	503514	16242.4	1.02129	0.949816	1583.34	59.8154
2013	4744.47	933.98	1.06276e+06	47444.7	463254	14943.7	1.04513	0.975355	1594.89	60.8508
2014	5074.23	1397.15	1.13663e+06	50742.3	692986	22354.4	1.11848	1.09633	2046.38	80.1381
2015	5175.47	971.78	1.15931e+06	51754.7	482003	15548.5	1.13913	1.16062	1869.67	78.1131
2016	5921.27	692.77	1.32636e+06	59212.7	343614	11084.3	1.02132	1.04493	1705.58	73.4553
2017	5886.96	695.36	1.31868e+06	58869.6	344899	11125.8	1	1	1663.58	69.9954
2018	6068.89	930.67	1.35943e+06	60688.9	461612	14890.7	0.972146	0.97391	1770.32	73.6077
2019	6169.99	935.4	1.38208e+06	61699.9	463958	14966.4	0.953258	0.948246	1759.75	72.6985
2020	6280.01	908.24	1.40672e+06	62800.1	450487	14531.8	0.89928	0.895657	1670.15	69.2629
2021	6387.42	950.05	1.43078e+06	63874.2	471225	15200.8	0.864151	0.827325	1643.62	65.4207
2022	6493.13	1077.1	1.45446e+06	64931.3	534242	17233.6	0.858352	0.818887	1707.01	67.2837
2023	6839.83	816.1	1.53212e+06	68398.3	404786	13057.6	0.819553	0.746469	1587.4	60.8043

## Sheet: 园区总磷排污
北京市	0.04																																园区（千公顷）*总磷排污系数	园区（公顷）*总磷排污系数
天津市	0.016	66.71	64.93	63.46	62.47	60.18	57.52	57.14	52.51	47.71	46.41	43.84	42.5	39.55	32.59	28.41		2.6684	2.5972	2.5384	2.4988	2.4072	2.3008	2.2856	2.1004	1.9084	1.8564	1.7536	1.7	1.582	1.3036	1.1364	2.6684	2668.4
河北省	0.036	33.01	34.36	32.55	33.71	34.15	32.96	33.35	33.62	31.46	28.64	26.57	24	22.41	18.94	14.34		0.52816	0.54976	0.5208	0.53936	0.5464	0.52736	0.5336	0.53792	0.50336	0.45824	0.42512	0.384	0.35856	0.30304	0.22944	2.5972	2597.2
山西省	0.043	844.82	811.36	745.99	699.97	661.34	650.17	594.09	553.08	560.07	529.73	506.02	521.62	472.51	473.77	460.52		30.4135	29.209	26.8556	25.1989	23.8082	23.4061	21.3872	19.9109	20.1625	19.0703	18.2167	18.7783	17.0104	17.0557	16.5787	2.5384	2538.4
内蒙古自治区	0.01	286.54	291.1	320.75	336.94	346.52	354.95	359.59	357.5	359.68	363.4	375.06	381.85	388.79	385.27	381.23		12.3212	12.5173	13.7922	14.4884	14.9004	15.2629	15.4624	15.3725	15.4662	15.6262	16.1276	16.4196	16.718	16.5666	16.3929	2.4988	2498.8
辽宁省	0.383	41.25	52.38	49.39	50.83	62.5	50.59	52.73	60.35	59.78	83.15	97.49	98.34	104.63	99.46	99.52		0.4125	0.5238	0.4939	0.5083	0.625	0.5059	0.5273	0.6035	0.5978	0.8315	0.9749	0.9834	1.0463	0.9946	0.9952	2.4072	2407.2
吉林省	0.296	345.17	344.61	350.37	389.94	391.76	402.78	413.19	359.14	350.69	352.06	352.74	358.38	347.04	339.79	340.37		132.2	131.986	134.192	149.347	150.044	154.265	158.252	137.551	134.314	134.839	135.099	137.26	132.916	130.14	130.362	2.3008	2300.8
黑龙江省	0.152	43.59	40.2	34.48	30.51	27.2	24.83	20.49	18.1	18.61	24.65	26.49	27.11	28.71	28.74	28.3		12.9026	11.8992	10.2061	9.03096	8.0512	7.34968	6.06504	5.3576	5.50856	7.2964	7.84104	8.02456	8.49816	8.50704	8.3768	2.2856	2285.6
上海市	0.179	35.34	36.15	34.98	35.33	34.24	34.71	33.93	32.28	27.2	20.42	29.71	41.14	45	44.77	44.84		5.37168	5.4948	5.31696	5.37016	5.20448	5.27592	5.15736	4.90656	4.1344	3.10384	4.51592	6.25328	6.84	6.80504	6.81568	2.1004	2100.4
江苏省	0.171	23.24	21.42	18.95	18.98	18.39	17.34	15.92	13.84	12.7	14.65	13.52	13.25	12.76	11.76	10.92		4.15996	3.83418	3.39205	3.39742	3.29181	3.10386	2.84968	2.47736	2.2733	2.62235	2.42008	2.37175	2.28404	2.10504	1.95468	1.9084	1908.4
浙江省	0.62	224.1	223.87	235.23	243.87	256.03	248.57	243.19	243.75	242.86	238.28	233.32	225.08	224.86	219.27	213.97		38.3211	38.2818	40.2243	41.7018	43.7811	42.5055	41.5855	41.6812	41.5291	40.7459	39.8977	38.4887	38.4511	37.4952	36.5889	1.8564	1856.4
安徽省	0.308	493.98	498.85	502.82	504.48	505.43	525.72	527.07	524.63	524.24	523.98	522.92	525.45	507.4	501.21	502.41		306.268	309.287	311.748	312.778	313.367	325.946	326.783	325.271	325.029	324.868	324.21	325.779	314.588	310.75	311.494	1.7536	1753.6
福建省	0.713	233.33	240.66	248.01	266.16	273.54	290.76	295.98	289.43	303.46	318.29	347.37	361	373.5	376.89	377.41		71.8656	74.1233	76.3871	81.9773	84.2503	89.5541	91.1618	89.1444	93.4657	98.0333	106.99	111.188	115.038	116.082	116.242	1.7	1700
江西省	0.563	635.8	611.06	588.87	577.29	563.13	543.35	532.64	508.95	517.56	542.68	563.88	579.72	600.45	618.09	632.25		453.325	435.686	419.864	411.608	401.512	387.409	379.772	362.881	369.02	386.931	402.046	413.34	428.121	440.698	450.794	1.582	1582
山东省	0.04	425.37	430.39	440.59	458.33	477.79	492.6	499.76	494.35	501.29	515.22	529.19	541.04	544.45	558.72	562.49		239.483	242.31	248.052	258.04	268.996	277.334	281.365	278.319	282.226	290.069	297.934	304.606	306.525	314.559	316.682	1.3036	1303.6
河南省	0.176	581.59	574.7	583.9	586.63	601.6	610.05	612.09	610.09	600.08	597.88	610.44	630.36	637.48	633.41	632.14		23.2636	22.988	23.356	23.4652	24.064	24.402	24.4836	24.4036	24.0032	23.9152	24.4176	25.2144	25.4992	25.3364	25.2856	1.1364	1136.4
湖北省	0.408	509.43	521.23	545.09	555.59	574.88	565.52	571.47	567.84	558.43	549.74	546.88	565.21	520	518.49	503.51		89.6597	91.7365	95.9358	97.7838	101.179	99.5315	100.579	99.9398	98.2837	96.7542	96.2509	99.477	91.52	91.2542	88.6178	0.52816	528.16
湖南省	0.454	535.99	538.8	572.46	576.04	592.18	605.18	599.78	606.37	629.13	687.67	728.56	759.22	779.38	787.8	796.82		218.684	219.83	233.564	235.024	241.609	246.913	244.71	247.399	256.685	280.569	297.252	309.762	317.987	321.422	325.103	0.54976	549.76
广东省	0.822	590.31	601.92	620.73	631.97	652.07	660.68	632.08	638.1	656.56	681.95	710.83	741.91	771.91	789.26	804.73		268.001	273.272	281.811	286.914	296.04	299.949	286.964	289.697	298.078	309.605	322.717	336.827	350.447	358.324	365.347	0.5208	520.8
广西壮族自治区	0.877	1060.91	1048.91	1042.17	1029.48	1031.46	1022.66	1020.52	1005.72	1018.94	1045.72	1079.2	1109.5	1140.03	1168.58	1207.54		872.068	862.204	856.664	846.233	847.86	840.627	838.867	826.702	837.569	859.582	887.102	912.009	937.105	960.573	992.598	0.53936	539.36
海南省	0.573	937.75	948.13	972.47	989.86	1026.11	1065.27	1125.58	1177.12	1249.11	1335.36	1409.18	1443.85	1485.39	1507.86	1513.25		822.407	831.51	852.856	868.107	899.898	934.242	987.134	1032.33	1095.47	1171.11	1235.85	1266.26	1302.69	1322.39	1327.12	0.5464	546.4
重庆市	0.321	170.95	174.81	179.48	179.46	170.79	164.93	161.64	159.7	167.39	172.67	173.25	180.56	193.34	206.92	210.9		97.9544	100.166	102.842	102.831	97.8627	94.5049	92.6197	91.5081	95.9145	98.9399	99.2722	103.461	110.784	118.565	120.846	0.52736	527.36
四川省	0.3	241.38	263.49	284.56	305.42	324.02	348.69	335.4	311.6	330.24	349.78	368.85	399.86	409.46	421.89	429.86		77.483	84.5803	91.3438	98.0398	104.01	111.929	107.663	100.024	106.007	112.279	118.401	128.355	131.437	135.427	137.985	0.5336	533.6
贵州省	0.322	750.13	778.73	817.14	859.2	891.42	925.57	957.56	1001.33	1049.99	1119.85	1163.55	1203.27	1242.3	1267.75	1301.32		225.039	233.619	245.142	257.76	267.426	277.671	287.268	300.399	314.997	335.955	349.065	360.981	372.69	380.325	390.396	0.53792	537.92
云南省	0.335	272.41	317.71	363.34	440.96	536.05	624.11	710.18	753.53	862.57	1046.1	1148.9	1255.89	1274.37	1243.36	1170.23		87.716	102.303	116.995	141.989	172.608	200.963	228.678	242.637	277.748	336.844	369.946	404.397	410.347	400.362	376.814	0.50336	503.36
西藏自治区	0.005	660.81	678.51	722.83	775.23	798.78	831.35	885.81	970.98	1007.87	1066.36	1109.34	1158.68	1213.02	1277.24	1303.32		221.371	227.301	242.148	259.702	267.591	278.502	296.746	325.278	337.636	357.231	371.629	388.158	406.362	427.875	436.612	0.45824	458.24
陕西省	0.09	1.6	0.6	2.31	2.18	2.17	2.59	3.76	5.4	0.79	0.9	7.76	7.79	9.48	9.08	11.22		0.008	0.003	0.01155	0.0109	0.01085	0.01295	0.0188	0.027	0.00395	0.0045	0.0388	0.03895	0.0474	0.0454	0.0561	0.42512	425.12
甘肃省	0.018	1025.77	1082.54	1104.14	1126.36	1149.59	1168.68	1174.72	1183.69	1213.45	1249.81	1279.36	1307.2	1326.23	1328.83	1326.99		92.3193	97.4286	99.3726	101.372	103.463	105.181	105.725	106.532	109.21	112.483	115.142	117.648	119.361	119.595	119.429	0.384	384
青海省	0.026	282.7	285.89	292.72	304	307.65	311.46	313.27	322.82	315.08	325.76	331.29	338.97	340.57	344.93	344.26		5.0886	5.14602	5.26896	5.472	5.5377	5.60628	5.63886	5.81076	5.67144	5.86368	5.96322	6.10146	6.13026	6.20874	6.19668	0.35856	358.56
宁夏回族自治区	0.023	4.51	5.09	5.05	6.84	6.85	7.68	8.57	6.2	6.24	7.4	7.59	7.23	6.72	6.31	2.65		0.11726	0.13234	0.1313	0.17784	0.1781	0.19968	0.22282	0.1612	0.16224	0.1924	0.19734	0.18798	0.17472	0.16406	0.0689	0.30304	303.04
新疆维吾尔自治区	0.016	86.92	98.73	98.42	97.86	98.61	95.22	89.74	84.63	79.59	92.36	102.98	104.69	104.04	104.16	96.15		1.99916	2.27079	2.26366	2.25078	2.26803	2.19006	2.06402	1.94649	1.83057	2.12428	2.36854	2.40787	2.39292	2.39568	2.21145	0.22944	229.44
		839.29	991.72	990.31	1015.15	933.98	1397.15	971.78	692.77	695.36	930.67	935.4	908.24	950.05	1077.1	816.1		13.4286	15.8675	15.845	16.2424	14.9437	22.3544	15.5485	11.0843	11.1258	14.8907	14.9664	14.5318	15.2008	17.2336	13.0576	30.4135	30413.5
																																	29.209	29209
																																	26.8556	26855.6
																																	25.1989	25198.9
																																	23.8082	23808.2
																																	23.4061	23406.1
																																	21.3872	21387.2
																																	19.9109	19910.9
																																	20.1625	20162.5
																																	19.0703	19070.3
																																	18.2167	18216.7
																																	18.7783	18778.3
																																	17.0104	17010.4
																																	17.0557	17055.7
																																	16.5787	16578.7
																																	12.3212	12321.2
																																	12.5173	12517.3
																																	13.7922	13792.2
																																	14.4884	14488.4
																																	14.9004	14900.4
																																	15.2629	15262.9
																																	15.4624	15462.4
																																	15.3725	15372.5
																																	15.4662	15466.2
																																	15.6262	15626.2
																																	16.1276	16127.6
																																	16.4196	16419.5
																																	16.718	16718
																																	16.5666	16566.6
																																	16.3929	16392.9
																																	0.4125	412.5
																																	0.5238	523.8
																																	0.4939	493.9
																																	0.5083	508.3
																																	0.625	625
																																	0.5059	505.9
																																	0.5273	527.3
																																	0.6035	603.5
																																	0.5978	597.8
																																	0.8315	831.5
																																	0.9749	974.9
																																	0.9834	983.4
																																	1.0463	1046.3
																																	0.9946	994.6
																																	0.9952	995.2
																																	132.2	132200
																																	131.986	131986
																																	134.192	134192
																																	149.347	149347
																																	150.044	150044
																																	154.265	154265
																																	158.252	158252
																																	137.551	137551
																																	134.314	134314
																																	134.839	134839
																																	135.099	135099
																																	137.26	137260
																																	132.916	132916
																																	130.14	130140
																																	130.362	130362
																																	12.9026	12902.6
																																	11.8992	11899.2
																																	10.2061	10206.1
																																	9.03096	9030.96
																																	8.0512	8051.2
																																	7.34968	7349.68
																																	6.06504	6065.04
																																	5.3576	5357.6
																																	5.50856	5508.56
																																	7.2964	7296.4
																																	7.84104	7841.04
																																	8.02456	8024.56
																																	8.49816	8498.16
																																	8.50704	8507.04
																																	8.3768	8376.8
																																	5.37168	5371.68
																																	5.4948	5494.8
																																	5.31696	5316.96
																																	5.37016	5370.16
																																	5.20448	5204.48
																																	5.27592	5275.92
																																	5.15736	5157.36
																																	4.90656	4906.56
																																	4.1344	4134.4
																																	3.10384	3103.84
																																	4.51592	4515.92
																																	6.25328	6253.28
																																	6.84	6840
																																	6.80504	6805.04
																																	6.81568	6815.68
																																	4.15996	4159.96
																																	3.83418	3834.18
																																	3.39205	3392.05
																																	3.39742	3397.42
																																	3.29181	3291.81
																																	3.10386	3103.86
																																	2.84968	2849.68
																																	2.47736	2477.36
																																	2.2733	2273.3
																																	2.62235	2622.35
																																	2.42008	2420.08
																																	2.37175	2371.75
																																	2.28404	2284.04
																																	2.10504	2105.04
																																	1.95468	1954.68
																																	38.3211	38321.1
																																	38.2818	38281.8
																																	40.2243	40224.3
																																	41.7018	41701.8
																																	43.7811	43781.1
																																	42.5055	42505.5
																																	41.5855	41585.5
																																	41.6812	41681.2
																																	41.5291	41529.1
																																	40.7459	40745.9
																																	39.8977	39897.7
																																	38.4887	38488.7
																																	38.4511	38451.1
																																	37.4952	37495.2
																																	36.5889	36588.9
																																	306.268	306268
																																	309.287	309287
																																	311.748	311748
																																	312.778	312778
																																	313.367	313367
																																	325.946	325946
																																	326.783	326783
																																	325.271	325271
																																	325.029	325029
																																	324.868	324868
																																	324.21	324210
																																	325.779	325779
																																	314.588	314588
																																	310.75	310750
																																	311.494	311494
																																	71.8656	71865.6
																																	74.1233	74123.3
																																	76.3871	76387.1
																																	81.9773	81977.3
																																	84.2503	84250.3
																																	89.5541	89554.1
																																	91.1618	91161.8
																																	89.1444	89144.4
																																	93.4657	93465.7
																																	98.0333	98033.3
																																	106.99	106990
																																	111.188	111188
																																	115.038	115038
																																	116.082	116082
																																	116.242	116242
																																	453.325	453325
																																	435.686	435686
																																	419.864	419864
																																	411.608	411608
																																	401.512	401512
																																	387.409	387409
																																	379.772	379772
																																	362.881	362881
																																	369.02	369020
																																	386.931	386931
																																	402.046	402046
																																	413.34	413340
																																	428.121	428121
																																	440.698	440698
																																	450.794	450794
																																	239.483	239483
																																	242.31	242310
																																	248.052	248052
																																	258.04	258040
																																	268.996	268996
																																	277.334	277334
																																	281.365	281365
																																	278.319	278319
																																	282.226	282226
																																	290.069	290069
																																	297.934	297934
																																	304.606	304606
																																	306.525	306525
																																	314.559	314559
																																	316.682	316682
																																	23.2636	23263.6
																																	22.988	22988
																																	23.356	23356
																																	23.4652	23465.2
																																	24.064	24064
																																	24.402	24402
																																	24.4836	24483.6
																																	24.4036	24403.6
																																	24.0032	24003.2
																																	23.9152	23915.2
																																	24.4176	24417.6
																																	25.2144	25214.4
																																	25.4992	25499.2
																																	25.3364	25336.4
																																	25.2856	25285.6
																																	89.6597	89659.7
																																	91.7365	91736.5
																																	95.9358	95935.8
																																	97.7838	97783.8
																																	101.179	101179
																																	99.5315	99531.5
																																	100.579	100579
																																	99.9398	99939.8
																																	98.2837	98283.7
																																	96.7542	96754.2
																																	96.2509	96250.9
																																	99.477	99477
																																	91.52	91520
																																	91.2542	91254.2
																																	88.6178	88617.8
																																	218.684	218684
																																	219.83	219830
																																	233.564	233564
																																	235.024	235024
																																	241.609	241609
																																	246.913	246913
																																	244.71	244710
																																	247.399	247399
																																	256.685	256685
																																	280.569	280569
																																	297.252	297252
																																	309.762	309762
																																	317.987	317987
																																	321.422	321422
																																	325.103	325103
																																	268.001	268001
																																	273.272	273272
																																	281.811	281811
																																	286.914	286914
																																	296.04	296040
																																	299.949	299949
																																	286.964	286964
																																	289.697	289697
																																	298.078	298078
																																	309.605	309605
																																	322.717	322717
																																	336.827	336827
																																	350.447	350447
																																	358.324	358324
																																	365.347	365347
																																	872.068	872068
																																	862.204	862204
																																	856.664	856664
																																	846.233	846233
																																	847.86	847860
																																	840.627	840627
																																	838.867	838867
																																	826.702	826702
																																	837.569	837569
																																	859.582	859582
																																	887.102	887102
																																	912.009	912009
																																	937.105	937105
																																	960.573	960573
																																	992.598	992598
																																	822.407	822407
																																	831.51	831510
																																	852.856	852856
																																	868.107	868107
																																	899.898	899898
																																	934.242	934242
																																	987.134	987134
																																	1032.33	1.03233e+06
																																	1095.47	1.09547e+06
																																	1171.11	1.17111e+06
																																	1235.85	1.23585e+06
																																	1266.26	1.26626e+06
																																	1302.69	1.30269e+06
																																	1322.39	1.32239e+06
																																	1327.12	1.32712e+06
																																	97.9544	97954.4
																																	100.166	100166
																																	102.842	102842
																																	102.831	102831
																																	97.8627	97862.7
																																	94.5049	94504.9
																																	92.6197	92619.7
																																	91.5081	91508.1
																																	95.9145	95914.5
																																	98.9399	98939.9
																																	99.2722	99272.2
																																	103.461	103461
																																	110.784	110784
																																	118.565	118565
																																	120.846	120846
																																	77.483	77483
																																	84.5803	84580.3
																																	91.3438	91343.8
																																	98.0398	98039.8
																																	104.01	104010
																																	111.929	111929
																																	107.663	107663
																																	100.024	100024
																																	106.007	106007
																																	112.279	112279
																																	118.401	118401
																																	128.355	128355
																																	131.437	131437
																																	135.427	135427
																																	137.985	137985
																																	225.039	225039
																																	233.619	233619
																																	245.142	245142
																																	257.76	257760
																																	267.426	267426
																																	277.671	277671
																																	287.268	287268
																																	300.399	300399
																																	314.997	314997
																																	335.955	335955
																																	349.065	349065
																																	360.981	360981
																																	372.69	372690
																																	380.325	380325
																																	390.396	390396
																																	87.716	87716
																																	102.303	102303
																																	116.995	116995
																																	141.989	141989
																																	172.608	172608
																																	200.963	200963
																																	228.678	228678
																																	242.637	242637
																																	277.748	277748
																																	336.844	336844
																																	369.946	369946
																																	404.397	404397
																																	410.347	410347
																																	400.362	400362
																																	376.814	376814
																																	221.371	221371
																																	227.301	227301
																																	242.148	242148
																																	259.702	259702
																																	267.591	267591
																																	278.502	278502
																																	296.746	296746
																																	325.278	325278
																																	337.636	337636
																																	357.231	357231
																																	371.629	371629
																																	388.158	388158
																																	406.362	406362
																																	427.875	427875
																																	436.612	436612
																																	0.008	8
																																	0.003	3
																																	0.01155	11.55
																																	0.0109	10.9
																																	0.01085	10.85
																																	0.01295	12.95
																																	0.0188	18.8
																																	0.027	27
																																	0.00395	3.95
																																	0.0045	4.5
																																	0.0388	38.8
																																	0.03895	38.95
																																	0.0474	47.4
																																	0.0454	45.4
																																	0.0561	56.1
																																	92.3193	92319.3
																																	97.4286	97428.6
																																	99.3726	99372.6
																																	101.372	101372
																																	103.463	103463
																																	105.181	105181
																																	105.725	105725
																																	106.532	106532
																																	109.21	109210
																																	112.483	112483
																																	115.142	115142
																																	117.648	117648
																																	119.361	119361
																																	119.595	119595
																																	119.429	119429
																																	5.0886	5088.6
																																	5.14602	5146.02
																																	5.26896	5268.96
																																	5.472	5472
																																	5.5377	5537.7
																																	5.60628	5606.28
																																	5.63886	5638.86
																																	5.81076	5810.76
																																	5.67144	5671.44
																																	5.86368	5863.68
																																	5.96322	5963.22
																																	6.10146	6101.46
																																	6.13026	6130.26
																																	6.20874	6208.74
																																	6.19668	6196.68
																																	0.11726	117.26
																																	0.13234	132.34
																																	0.1313	131.3
																																	0.17784	177.84
																																	0.1781	178.1
																																	0.19968	199.68
																																	0.22282	222.82
																																	0.1612	161.2
																																	0.16224	162.24
																																	0.1924	192.4
																																	0.19734	197.34
																																	0.18798	187.98
																																	0.17472	174.72
																																	0.16406	164.06
																																	0.0689	68.9
																																	1.99916	1999.16
																																	2.27079	2270.79
																																	2.26366	2263.66
																																	2.25078	2250.78
																																	2.26803	2268.03
																																	2.19006	2190.06
																																	2.06402	2064.02
																																	1.94649	1946.49
																																	1.83057	1830.57
																																	2.12428	2124.28
																																	2.36854	2368.54
																																	2.40787	2407.87
																																	2.39292	2392.92
																																	2.39568	2395.68
																																	2.21145	2211.45
																																	13.4286	13428.6
																																	15.8675	15867.5
																																	15.845	15845
																																	16.2424	16242.4
																																	14.9437	14943.7
																																	22.3544	22354.4
																																	15.5485	15548.5
																																	11.0843	11084.3
																																	11.1258	11125.8
																																	14.8907	14890.7
																																	14.9664	14966.4
																																	14.5318	14531.8
																																	15.2008	15200.8
																																	17.2336	17233.6
																																	13.0576	13057.6

## Sheet: 园区氮排污
北京市	1.577																																园区（千公顷）*总氮排污系数	园区（公顷）*总氮排污系数
天津市	1.412	66.71	64.93	63.46	62.47	60.18	57.52	57.14	52.51	47.71	46.41	43.84	42.5	39.55	32.59	28.41		105.202	102.395	100.076	98.5152	94.9039	90.709	90.1098	82.8083	75.2387	73.1886	69.1357	67.0225	62.3704	51.3944	44.8026	105.202	105202
河北省	1.448	33.01	34.36	32.55	33.71	34.15	32.96	33.35	33.62	31.46	28.64	26.57	24	22.41	18.94	14.34		46.6101	48.5163	45.9606	47.5985	48.2198	46.5395	47.0902	47.4714	44.4215	40.4397	37.5168	33.888	31.6429	26.7433	20.2481	102.395	102395
山西省	2.181	844.82	811.36	745.99	699.97	661.34	650.17	594.09	553.08	560.07	529.73	506.02	521.62	472.51	473.77	460.52		1223.3	1174.85	1080.19	1013.56	957.62	941.446	860.242	800.86	810.981	767.049	732.717	755.306	684.194	686.019	666.833	100.076	100076
内蒙古自治区	0.205	286.54	291.1	320.75	336.94	346.52	354.95	359.59	357.5	359.68	363.4	375.06	381.85	388.79	385.27	381.23		624.944	634.889	699.556	734.866	755.76	774.146	784.266	779.707	784.462	792.575	818.006	832.815	847.951	840.274	831.463	98.5152	98515.2
辽宁省	6.466	41.25	52.38	49.39	50.83	62.5	50.59	52.73	60.35	59.78	83.15	97.49	98.34	104.63	99.46	99.52		8.45625	10.7379	10.125	10.4201	12.8125	10.371	10.8096	12.3718	12.2549	17.0458	19.9855	20.1597	21.4491	20.3893	20.4016	94.9039	94903.9
吉林省	4.988	345.17	344.61	350.37	389.94	391.76	402.78	413.19	359.14	350.69	352.06	352.74	358.38	347.04	339.79	340.37		2231.87	2228.25	2265.49	2521.35	2533.12	2604.38	2671.69	2322.2	2267.56	2276.42	2280.82	2317.29	2243.96	2197.08	2200.83	90.709	90709
黑龙江省	2.588	43.59	40.2	34.48	30.51	27.2	24.83	20.49	18.1	18.61	24.65	26.49	27.11	28.71	28.74	28.3		217.427	200.518	171.986	152.184	135.674	123.852	102.204	90.2828	92.8267	122.954	132.132	135.225	143.205	143.355	141.16	90.1098	90109.8
上海市	10.986	35.34	36.15	34.98	35.33	34.24	34.71	33.93	32.28	27.2	20.42	29.71	41.14	45	44.77	44.84		91.4599	93.5562	90.5282	91.434	88.6131	89.8295	87.8108	83.5406	70.3936	52.847	76.8895	106.47	116.46	115.865	116.046	82.8083	82808.3
江苏省	6.679	23.24	21.42	18.95	18.98	18.39	17.34	15.92	13.84	12.7	14.65	13.52	13.25	12.76	11.76	10.92		255.315	235.32	208.185	208.514	202.033	190.497	174.897	152.046	139.522	160.945	148.531	145.565	140.181	129.195	119.967	75.2387	75238.7
浙江省	10.147	224.1	223.87	235.23	243.87	256.03	248.57	243.19	243.75	242.86	238.28	233.32	225.08	224.86	219.27	213.97		1496.76	1495.23	1571.1	1628.81	1710.02	1660.2	1624.27	1628.01	1622.06	1591.47	1558.34	1503.31	1501.84	1464.5	1429.11	73.1886	73188.6
安徽省	5.575	493.98	498.85	502.82	504.48	505.43	525.72	527.07	524.63	524.24	523.98	522.92	525.45	507.4	501.21	502.41		5012.42	5061.83	5102.11	5118.96	5128.6	5334.48	5348.18	5323.42	5319.46	5316.83	5306.07	5331.74	5148.59	5085.78	5097.95	69.1357	69135.7
福建省	8.574	233.33	240.66	248.01	266.16	273.54	290.76	295.98	289.43	303.46	318.29	347.37	361	373.5	376.89	377.41		1300.81	1341.68	1382.66	1483.84	1524.99	1620.99	1650.09	1613.57	1691.79	1774.47	1936.59	2012.58	2082.26	2101.16	2104.06	67.0225	67022.5
江西省	7.689	635.8	611.06	588.87	577.29	563.13	543.35	532.64	508.95	517.56	542.68	563.88	579.72	600.45	618.09	632.25		5451.35	5239.23	5048.97	4949.68	4828.28	4658.68	4566.86	4363.74	4437.56	4652.94	4834.71	4970.52	5148.26	5299.5	5420.91	62.3704	62370.3
山东省	2.063	425.37	430.39	440.59	458.33	477.79	492.6	499.76	494.35	501.29	515.22	529.19	541.04	544.45	558.72	562.49		3270.67	3309.27	3387.7	3524.1	3673.73	3787.6	3842.65	3801.06	3854.42	3961.53	4068.94	4160.06	4186.28	4296	4324.99	51.3944	51394.4
河南省	4.071	581.59	574.7	583.9	586.63	601.6	610.05	612.09	610.09	600.08	597.88	610.44	630.36	637.48	633.41	632.14		1199.82	1185.61	1204.59	1210.22	1241.1	1258.53	1262.74	1258.62	1237.97	1233.43	1259.34	1300.43	1315.12	1306.72	1304.1	44.8026	44802.6
湖北省	5.741	509.43	521.23	545.09	555.59	574.88	565.52	571.47	567.84	558.43	549.74	546.88	565.21	520	518.49	503.51		2073.89	2121.93	2219.06	2261.81	2340.34	2302.23	2326.45	2311.68	2273.37	2237.99	2226.35	2300.97	2116.92	2110.77	2049.79	46.6101	46610.1
湖南省	5.003	535.99	538.8	572.46	576.04	592.18	605.18	599.78	606.37	629.13	687.67	728.56	759.22	779.38	787.8	796.82		3077.12	3093.25	3286.49	3307.05	3399.71	3474.34	3443.34	3481.17	3611.84	3947.91	4182.66	4358.68	4474.42	4522.76	4574.54	48.5163	48516.3
广东省	12.995	590.31	601.92	620.73	631.97	652.07	660.68	632.08	638.1	656.56	681.95	710.83	741.91	771.91	789.26	804.73		2953.32	3011.41	3105.51	3161.75	3262.31	3305.38	3162.3	3192.41	3284.77	3411.8	3556.28	3711.78	3861.87	3948.67	4026.06	45.9606	45960.6
广西壮族自治区	13.27	1060.91	1048.91	1042.17	1029.48	1031.46	1022.66	1020.52	1005.72	1018.94	1045.72	1079.2	1109.5	1140.03	1168.58	1207.54		13786.5	13630.6	13543	13378.1	13403.8	13289.5	13261.7	13069.3	13241.1	13589.1	14024.2	14418	14814.7	15185.7	15692	47.5985	47598.5
海南省	9.211	937.75	948.13	972.47	989.86	1026.11	1065.27	1125.58	1177.12	1249.11	1335.36	1409.18	1443.85	1485.39	1507.86	1513.25		12443.9	12581.7	12904.7	13135.4	13616.5	14136.1	14936.4	15620.4	16575.7	17720.2	18699.8	19159.9	19711.1	20009.3	20080.8	48.2198	48219.8
重庆市	2.133	170.95	174.81	179.48	179.46	170.79	164.93	161.64	159.7	167.39	172.67	173.25	180.56	193.34	206.92	210.9		1574.62	1610.17	1653.19	1653.01	1573.15	1519.17	1488.87	1471	1541.83	1590.46	1595.81	1663.14	1780.85	1905.94	1942.6	46.5395	46539.5
四川省	3.359	241.38	263.49	284.56	305.42	324.02	348.69	335.4	311.6	330.24	349.78	368.85	399.86	409.46	421.89	429.86		514.864	562.024	606.966	651.461	691.135	743.756	715.408	664.643	704.402	746.081	786.757	852.901	873.378	899.891	916.891	47.0902	47090.2
贵州省	2.195	750.13	778.73	817.14	859.2	891.42	925.57	957.56	1001.33	1049.99	1119.85	1163.55	1203.27	1242.3	1267.75	1301.32		2519.69	2615.75	2744.77	2886.05	2994.28	3108.99	3216.44	3363.47	3526.92	3761.58	3908.36	4041.78	4172.89	4258.37	4371.13	47.4714	47471.4
云南省	3.087	272.41	317.71	363.34	440.96	536.05	624.11	710.18	753.53	862.57	1046.1	1148.9	1255.89	1274.37	1243.36	1170.23		597.94	697.373	797.531	967.907	1176.63	1369.92	1558.85	1654	1893.34	2296.19	2521.84	2756.68	2797.24	2729.18	2568.65	44.4215	44421.5
西藏自治区	0.169	660.81	678.51	722.83	775.23	798.78	831.35	885.81	970.98	1007.87	1066.36	1109.34	1158.68	1213.02	1277.24	1303.32		2039.92	2094.56	2231.38	2393.14	2465.83	2566.38	2734.5	2997.42	3111.29	3291.85	3424.53	3576.85	3744.59	3942.84	4023.35	40.4397	40439.7
陕西省	1.115	1.6	0.6	2.31	2.18	2.17	2.59	3.76	5.4	0.79	0.9	7.76	7.79	9.48	9.08	11.22		0.2704	0.1014	0.39039	0.36842	0.36673	0.43771	0.63544	0.9126	0.13351	0.1521	1.31144	1.31651	1.60212	1.53452	1.89618	37.5168	37516.8
甘肃省	0.493	1025.77	1082.54	1104.14	1126.36	1149.59	1168.68	1174.72	1183.69	1213.45	1249.81	1279.36	1307.2	1326.23	1328.83	1326.99		1143.73	1207.03	1231.12	1255.89	1281.79	1303.08	1309.81	1319.81	1353	1393.54	1426.49	1457.53	1478.75	1481.65	1479.59	33.888	33888
青海省	0.829	282.7	285.89	292.72	304	307.65	311.46	313.27	322.82	315.08	325.76	331.29	338.97	340.57	344.93	344.26		139.371	140.944	144.311	149.872	151.671	153.55	154.442	159.15	155.334	160.6	163.326	167.112	167.901	170.05	169.72	31.6429	31642.9
宁夏回族自治区	0.74	4.51	5.09	5.05	6.84	6.85	7.68	8.57	6.2	6.24	7.4	7.59	7.23	6.72	6.31	2.65		3.73879	4.21961	4.18645	5.67036	5.67865	6.36672	7.10453	5.1398	5.17296	6.1346	6.29211	5.99367	5.57088	5.23099	2.19685	26.7433	26743.3
新疆维吾尔自治区	0.496	86.92	98.73	98.42	97.86	98.61	95.22	89.74	84.63	79.59	92.36	102.98	104.69	104.04	104.16	96.15		64.3208	73.0602	72.8308	72.4164	72.9714	70.4628	66.4076	62.6262	58.8966	68.3464	76.2052	77.4706	76.9896	77.0784	71.151	20.2481	20248.1
		839.29	991.72	990.31	1015.15	933.98	1397.15	971.78	692.77	695.36	930.67	935.4	908.24	950.05	1077.1	816.1		416.288	491.893	491.194	503.514	463.254	692.986	482.003	343.614	344.899	461.612	463.958	450.487	471.225	534.242	404.786	1223.3	1.2233e+06
																																	1174.85	1.17485e+06
																																	1080.19	1.08019e+06
																																	1013.56	1.01356e+06
																																	957.62	957620
																																	941.446	941446
																																	860.242	860242
																																	800.86	800860
																																	810.981	810981
																																	767.049	767049
																																	732.717	732717
																																	755.306	755306
																																	684.194	684194
																																	686.019	686019
																																	666.833	666833
																																	624.944	624944
																																	634.889	634889
																																	699.556	699556
																																	734.866	734866
																																	755.76	755760
																																	774.146	774146
																																	784.266	784266
																																	779.707	779708
																																	784.462	784462
																																	792.575	792575
																																	818.006	818006
																																	832.815	832815
																																	847.951	847951
																																	840.274	840274
																																	831.463	831463
																																	8.45625	8456.25
																																	10.7379	10737.9
																																	10.125	10125
																																	10.4201	10420.1
																																	12.8125	12812.5
																																	10.371	10371
																																	10.8096	10809.6
																																	12.3718	12371.8
																																	12.2549	12254.9
																																	17.0458	17045.8
																																	19.9855	19985.5
																																	20.1597	20159.7
																																	21.4491	21449.2
																																	20.3893	20389.3
																																	20.4016	20401.6
																																	2231.87	2.23187e+06
																																	2228.25	2.22825e+06
																																	2265.49	2.26549e+06
																																	2521.35	2.52135e+06
																																	2533.12	2.53312e+06
																																	2604.38	2.60438e+06
																																	2671.69	2.67169e+06
																																	2322.2	2.3222e+06
																																	2267.56	2.26756e+06
																																	2276.42	2.27642e+06
																																	2280.82	2.28082e+06
																																	2317.29	2.31729e+06
																																	2243.96	2.24396e+06
																																	2197.08	2.19708e+06
																																	2200.83	2.20083e+06
																																	217.427	217427
																																	200.518	200518
																																	171.986	171986
																																	152.184	152184
																																	135.674	135674
																																	123.852	123852
																																	102.204	102204
																																	90.2828	90282.8
																																	92.8267	92826.7
																																	122.954	122954
																																	132.132	132132
																																	135.225	135225
																																	143.205	143205
																																	143.355	143355
																																	141.16	141160
																																	91.4599	91459.9
																																	93.5562	93556.2
																																	90.5282	90528.2
																																	91.434	91434
																																	88.6131	88613.1
																																	89.8295	89829.5
																																	87.8108	87810.8
																																	83.5406	83540.6
																																	70.3936	70393.6
																																	52.847	52847
																																	76.8895	76889.5
																																	106.47	106470
																																	116.46	116460
																																	115.865	115865
																																	116.046	116046
																																	255.315	255315
																																	235.32	235320
																																	208.185	208185
																																	208.514	208514
																																	202.033	202033
																																	190.497	190497
																																	174.897	174897
																																	152.046	152046
																																	139.522	139522
																																	160.945	160945
																																	148.531	148531
																																	145.565	145564
																																	140.181	140181
																																	129.195	129195
																																	119.967	119967
																																	1496.76	1.49676e+06
																																	1495.23	1.49523e+06
																																	1571.1	1.5711e+06
																																	1628.81	1.62881e+06
																																	1710.02	1.71002e+06
																																	1660.2	1.6602e+06
																																	1624.27	1.62427e+06
																																	1628.01	1.62801e+06
																																	1622.06	1.62206e+06
																																	1591.47	1.59147e+06
																																	1558.34	1.55834e+06
																																	1503.31	1.50331e+06
																																	1501.84	1.50184e+06
																																	1464.5	1.4645e+06
																																	1429.11	1.42911e+06
																																	5012.42	5.01242e+06
																																	5061.83	5.06183e+06
																																	5102.11	5.10211e+06
																																	5118.96	5.11896e+06
																																	5128.6	5.1286e+06
																																	5334.48	5.33448e+06
																																	5348.18	5.34818e+06
																																	5323.42	5.32342e+06
																																	5319.46	5.31946e+06
																																	5316.83	5.31683e+06
																																	5306.07	5.30607e+06
																																	5331.74	5.33174e+06
																																	5148.59	5.14859e+06
																																	5085.78	5.08578e+06
																																	5097.95	5.09795e+06
																																	1300.81	1.30081e+06
																																	1341.68	1.34168e+06
																																	1382.66	1.38266e+06
																																	1483.84	1483842
																																	1524.99	1.52499e+06
																																	1620.99	1620987
																																	1650.09	1.65009e+06
																																	1613.57	1.61357e+06
																																	1691.79	1.69179e+06
																																	1774.47	1.77447e+06
																																	1936.59	1.93659e+06
																																	2012.58	2012575
																																	2082.26	2.08226e+06
																																	2101.16	2.10116e+06
																																	2104.06	2.10406e+06
																																	5451.35	5.45135e+06
																																	5239.23	5.23923e+06
																																	5048.97	5.04897e+06
																																	4949.68	4.94968e+06
																																	4828.28	4.82828e+06
																																	4658.68	4.65868e+06
																																	4566.86	4.56686e+06
																																	4363.74	4.36374e+06
																																	4437.56	4.43756e+06
																																	4652.94	4.65294e+06
																																	4834.71	4.83471e+06
																																	4970.52	4.97052e+06
																																	5148.26	5.14826e+06
																																	5299.5	5.2995e+06
																																	5420.91	5.42091e+06
																																	3270.67	3.27067e+06
																																	3309.27	3.30927e+06
																																	3387.7	3.3877e+06
																																	3524.1	3.5241e+06
																																	3673.73	3.67373e+06
																																	3787.6	3.7876e+06
																																	3842.65	3.84265e+06
																																	3801.06	3.80106e+06
																																	3854.42	3.85442e+06
																																	3961.53	3.96153e+06
																																	4068.94	4.06894e+06
																																	4160.06	4.16006e+06
																																	4186.28	4.18628e+06
																																	4296	4.296e+06
																																	4324.99	4.32499e+06
																																	1199.82	1.19982e+06
																																	1185.61	1.18561e+06
																																	1204.59	1.20459e+06
																																	1210.22	1.21022e+06
																																	1241.1	1.2411e+06
																																	1258.53	1.25853e+06
																																	1262.74	1.26274e+06
																																	1258.62	1.25862e+06
																																	1237.97	1.23797e+06
																																	1233.43	1.23343e+06
																																	1259.34	1.25934e+06
																																	1300.43	1.30043e+06
																																	1315.12	1.31512e+06
																																	1306.72	1.30672e+06
																																	1304.1	1.3041e+06
																																	2073.89	2.07389e+06
																																	2121.93	2.12193e+06
																																	2219.06	2.21906e+06
																																	2261.81	2.26181e+06
																																	2340.34	2.34034e+06
																																	2302.23	2.30223e+06
																																	2326.45	2.32645e+06
																																	2311.68	2.31168e+06
																																	2273.37	2.27337e+06
																																	2237.99	2.23799e+06
																																	2226.35	2.22635e+06
																																	2300.97	2.30097e+06
																																	2116.92	2116920
																																	2110.77	2.11077e+06
																																	2049.79	2.04979e+06
																																	3077.12	3.07712e+06
																																	3093.25	3.09325e+06
																																	3286.49	3.28649e+06
																																	3307.05	3.30705e+06
																																	3399.71	3.39971e+06
																																	3474.34	3.47434e+06
																																	3443.34	3.44334e+06
																																	3481.17	3.48117e+06
																																	3611.84	3.61184e+06
																																	3947.91	3.94791e+06
																																	4182.66	4.18266e+06
																																	4358.68	4.35868e+06
																																	4474.42	4.47442e+06
																																	4522.76	4.52276e+06
																																	4574.54	4.57454e+06
																																	2953.32	2.95332e+06
																																	3011.41	3.01141e+06
																																	3105.51	3.10551e+06
																																	3161.75	3.16175e+06
																																	3262.31	3.26231e+06
																																	3305.38	3.30538e+06
																																	3162.3	3.1623e+06
																																	3192.41	3.19241e+06
																																	3284.77	3.28477e+06
																																	3411.8	3.4118e+06
																																	3556.28	3.55628e+06
																																	3711.78	3.71178e+06
																																	3861.87	3.86187e+06
																																	3948.67	3.94867e+06
																																	4026.06	4.02606e+06
																																	13786.5	1.37865e+07
																																	13630.6	1.36306e+07
																																	13543	1.3543e+07
																																	13378.1	1.33781e+07
																																	13403.8	1.34038e+07
																																	13289.5	1.32895e+07
																																	13261.7	1.32617e+07
																																	13069.3	1.30693e+07
																																	13241.1	1.32411e+07
																																	13589.1	1.35891e+07
																																	14024.2	14024204
																																	14418	1.4418e+07
																																	14814.7	1.48147e+07
																																	15185.7	1.51857e+07
																																	15692	1.5692e+07
																																	12443.9	1.24439e+07
																																	12581.7	1.25817e+07
																																	12904.7	1.29047e+07
																																	13135.4	1.31354e+07
																																	13616.5	1.36165e+07
																																	14136.1	1.41361e+07
																																	14936.4	1.49364e+07
																																	15620.4	1.56204e+07
																																	16575.7	1.65757e+07
																																	17720.2	1.77202e+07
																																	18699.8	1.86998e+07
																																	19159.9	1.91599e+07
																																	19711.1	1.97111e+07
																																	20009.3	2.00093e+07
																																	20080.8	2.00808e+07
																																	1574.62	1.57462e+06
																																	1610.17	1.61017e+06
																																	1653.19	1.65319e+06
																																	1653.01	1.65301e+06
																																	1573.15	1.57315e+06
																																	1519.17	1.51917e+06
																																	1488.87	1.48887e+06
																																	1471	1.471e+06
																																	1541.83	1.54183e+06
																																	1590.46	1.59046e+06
																																	1595.81	1.59581e+06
																																	1663.14	1.66314e+06
																																	1780.85	1.78085e+06
																																	1905.94	1.90594e+06
																																	1942.6	1.9426e+06
																																	514.864	514864
																																	562.024	562024
																																	606.966	606966
																																	651.461	651461
																																	691.135	691135
																																	743.756	743756
																																	715.408	715408
																																	664.643	664643
																																	704.402	704402
																																	746.081	746081
																																	786.757	786757
																																	852.901	852901
																																	873.378	873378
																																	899.891	899891
																																	916.891	916891
																																	2519.69	2.51969e+06
																																	2615.75	2.61575e+06
																																	2744.77	2.74477e+06
																																	2886.05	2.88605e+06
																																	2994.28	2.99428e+06
																																	3108.99	3.10899e+06
																																	3216.44	3.21644e+06
																																	3363.47	3.36347e+06
																																	3526.92	3.52692e+06
																																	3761.58	3.76158e+06
																																	3908.36	3.90836e+06
																																	4041.78	4.04178e+06
																																	4172.89	4.17289e+06
																																	4258.37	4.25837e+06
																																	4371.13	4.37113e+06
																																	597.94	597940
																																	697.373	697373
																																	797.531	797531
																																	967.907	967907
																																	1176.63	1.17663e+06
																																	1369.92	1.36992e+06
																																	1558.85	1.55885e+06
																																	1654	1.654e+06
																																	1893.34	1.89334e+06
																																	2296.19	2.29619e+06
																																	2521.84	2.52184e+06
																																	2756.68	2.75668e+06
																																	2797.24	2.79724e+06
																																	2729.18	2.72918e+06
																																	2568.65	2.56865e+06
																																	2039.92	2.03992e+06
																																	2094.56	2.09456e+06
																																	2231.38	2.23138e+06
																																	2393.14	2.39314e+06
																																	2465.83	2.46583e+06
																																	2566.38	2.56638e+06
																																	2734.5	2.7345e+06
																																	2997.42	2.99742e+06
																																	3111.29	3.11129e+06
																																	3291.85	3.29185e+06
																																	3424.53	3.42453e+06
																																	3576.85	3.57685e+06
																																	3744.59	3.74459e+06
																																	3942.84	3.94284e+06
																																	4023.35	4.02335e+06
																																	0.2704	270.4
																																	0.1014	101.4
																																	0.39039	390.39
																																	0.36842	368.42
																																	0.36673	366.73
																																	0.43771	437.71
																																	0.63544	635.44
																																	0.9126	912.6
																																	0.13351	133.51
																																	0.1521	152.1
																																	1.31144	1311.44
																																	1.31651	1316.51
																																	1.60212	1602.12
																																	1.53452	1534.52
																																	1.89618	1896.18
																																	1143.73	1.14373e+06
																																	1207.03	1.20703e+06
																																	1231.12	1.23112e+06
																																	1255.89	1.25589e+06
																																	1281.79	1.28179e+06
																																	1303.08	1.30308e+06
																																	1309.81	1.30981e+06
																																	1319.81	1.31981e+06
																																	1353	1.353e+06
																																	1393.54	1.39354e+06
																																	1426.49	1.42649e+06
																																	1457.53	1457528
																																	1478.75	1.47875e+06
																																	1481.65	1.48165e+06
																																	1479.59	1.47959e+06
																																	139.371	139371
																																	140.944	140944
																																	144.311	144311
																																	149.872	149872
																																	151.671	151671
																																	153.55	153550
																																	154.442	154442
																																	159.15	159150
																																	155.334	155334
																																	160.6	160600
																																	163.326	163326
																																	167.112	167112
																																	167.901	167901
																																	170.05	170050
																																	169.72	169720
																																	3.73879	3738.79
																																	4.21961	4219.61
																																	4.18645	4186.45
																																	5.67036	5670.36
																																	5.67865	5678.65
																																	6.36672	6366.72
																																	7.10453	7104.53
																																	5.1398	5139.8
																																	5.17296	5172.96
																																	6.1346	6134.6
																																	6.29211	6292.11
																																	5.99367	5993.67
																																	5.57088	5570.88
																																	5.23099	5230.99
																																	2.19685	2196.85
																																	64.3208	64320.8
																																	73.0602	73060.2
																																	72.8308	72830.8
																																	72.4164	72416.4
																																	72.9714	72971.4
																																	70.4628	70462.8
																																	66.4076	66407.6
																																	62.6262	62626.2
																																	58.8966	58896.6
																																	68.3464	68346.4
																																	76.2052	76205.2
																																	77.4706	77470.6
																																	76.9896	76989.6
																																	77.0784	77078.4
																																	71.151	71151
																																	416.288	416288
																																	491.893	491893
																																	491.194	491194
																																	503.514	503514
																																	463.254	463254
																																	692.986	692986
																																	482.003	482003
																																	343.614	343614
																																	344.899	344899
																																	461.612	461612
																																	463.958	463958
																																	450.487	450487
																																	471.225	471225
																																	534.242	534242
																																	404.786	404786

## Sheet: 粮食总磷排污
北京市	0.063																																粮食（千公顷）*总氮排污系数	粮食（公顷）*总氮排污系数
天津市	0.09	316.76	313.62	298.62	278.03	237.29	194.64	172.14	145.55	120.94	103.79	88.55	98.18	117.85	143.81	158.98		19.9559	19.7581	18.8131	17.5159	14.9493	12.2623	10.8448	9.16965	7.61922	6.53877	5.57865	6.18534	7.42455	9.06003	10.0157	19.9559	19955.9
河北省	0.067	440.31	438.78	442.45	448.98	441.34	443.01	433.28	443.66	439.52	429.27	410.27	419.17	437	443.51	453.1		39.6279	39.4902	39.8205	40.4082	39.7206	39.8709	38.9952	39.9294	39.5568	38.6343	36.9243	37.7253	39.33	39.9159	40.779	19.7581	19758.1
山西省	0.061	8416.08	8260.75	8278.32	8361.89	8416.01	8454.9	8457.76	8467.51	8381.65	8197.13	8132.69	8089.44	8097.2	8113.99	8098.23		563.877	553.47	554.647	560.247	563.873	566.478	566.67	567.323	561.571	549.208	544.89	541.992	542.512	543.637	542.581	18.8131	18813.1
内蒙古自治区	0.015	3561.48	3638.11	3694.41	3696.23	3667.89	3664.57	3612.65	3591.54	3577.62	3555.16	3524.42	3541.51	3587.95	3611.59	3641.72		217.25	221.925	225.359	225.47	223.741	223.539	220.372	219.084	218.235	216.865	214.99	216.032	218.865	220.307	222.145	17.5159	17515.9
辽宁省	0.062	6895.77	7362.07	7539.51	7670.84	7823.05	8079.08	8423.68	8957.21	9014.22	8824.07	8885.02	8882.81	8743.34	8750.68	8808.87		103.437	110.431	113.093	115.063	117.346	121.186	126.355	134.358	135.213	132.361	133.275	133.242	131.15	131.26	132.133	14.9493	14949.3
吉林省	0.015	3810.64	3950.14	3997.53	4095.55	4154.41	4219.8	4335.47	4242.73	4172.32	4207.11	4217.1	4287.78	4328.94	4326.86	4361.42		236.26	244.909	247.847	253.924	257.573	261.628	268.799	263.049	258.684	260.841	261.46	265.842	268.394	268.265	270.408	12.2623	12262.3
黑龙江省	0.104	5091.09	5258.93	5297.23	5431.98	5632.95	5890.5	5997.91	6063.25	6086.2	6080.89	6117.05	6150.99	6187.06	6226.36	6292.47		76.3663	78.8839	79.4584	81.4797	84.4942	88.3575	89.9686	90.9488	91.293	91.2134	91.7558	92.2648	92.8059	93.3954	94.3871	10.8448	10844.8
上海市	0.767	12840.7	13347.6	13749.6	13929.7	14212	14497.7	14811.9	14829.5	14767.6	14673.3	14770.1	14910.1	15065	15209.4	15304.2		1335.43	1388.16	1429.96	1448.69	1478.05	1507.76	1540.44	1542.26	1535.83	1526.03	1536.09	1550.65	1566.76	1581.78	1591.64	9.16965	9169.65
江苏省	0.701	415.4	415.58	420.03	401.64	391.3	369.91	350.64	303.78	284.95	282.27	261.39	255.16	264.35	269.17	273.2		318.612	318.75	322.163	308.058	300.127	283.721	268.941	232.999	218.557	216.501	200.486	195.708	202.756	206.453	209.544	7.61922	7619.22
浙江省	2.445	7407.98	7462.35	7508.44	7569.22	7597.93	7615.79	7693.7	7639.9	7556.4	7520.23	7442.63	7478.4	7514.45	7534.24	7589.96		5192.99	5231.11	5263.42	5306.02	5326.15	5338.67	5393.28	5355.57	5297.04	5271.68	5217.28	5242.36	5267.63	5281.5	5320.56	6.53877	6538.77
安徽省	0.574	2444.08	2322.55	2267.84	2095.67	2062.45	1986.77	1977.8	1946.46	1981.11	1978.68	1999.62	2014.5	2014.59	2027.16	2041.38		5975.78	5678.63	5544.87	5123.91	5042.69	4857.65	4835.72	4759.09	4843.81	4837.87	4889.07	4925.45	4925.67	4956.41	4991.17	5.57865	5578.65
福建省	1.451	9344.68	9386.19	9392.44	9336.3	9364.9	9500.18	9598.29	8790.1	8726.68	8771.11	8781.96	8817.99	8886.77	8933.59	9043.96		5363.85	5387.67	5391.26	5359.04	5375.45	5453.1	5509.42	5045.52	5009.11	5034.62	5040.85	5061.53	5101.01	5127.88	5191.23	6.18534	6185.34
江西省	0.86	2075.31	1945.91	1878.97	1761.23	1740.96	1670.17	1617.17	1548.8	1549.34	1577.31	1599.29	1631.27	1651.87	1682.14	1712.25		3011.27	2823.52	2726.39	2555.54	2526.13	2423.42	2346.51	2247.31	2248.09	2288.68	2320.57	2366.97	2396.86	2440.79	2484.47	7.42455	7424.55
山东省	0.019	5488.36	5505	5546.41	5596.83	5636.98	5667.34	5688.41	5668.88	5638.46	5555.81	5521.18	5644.37	5672.94	5730.55	5797.01		4719.99	4734.3	4769.91	4813.27	4847.8	4873.91	4892.03	4875.24	4849.08	4778	4748.21	4854.16	4878.73	4928.27	4985.43	9.06003	9060.03
河南省	0.234	10910	10677.4	10782.9	10862.3	11136.6	11316.6	11381	11278.6	11107.8	11076.8	10933.1	10889.1	10948.6	10964.1	11002.7		207.29	202.871	204.874	206.383	211.596	215.016	216.239	214.294	211.048	210.459	207.729	206.892	208.023	208.319	209.052	10.0157	10015.7
湖北省	0.791	14235.7	14320.8	14373.3	14386.9	14586.5	14731.5	14879.7	14902.7	14732.5	14783.4	14714	14688	14705.1	14711.5	14747.1		3331.15	3351.06	3363.36	3366.53	3413.24	3447.18	3481.86	3487.24	3447.41	3459.3	3443.07	3436.99	3441	3442.49	3450.83	39.6279	39627.9
湖南省	0.577	7328.5	7377.94	7454.98	7684.4	7731.26	7791.42	7983.43	7908.5	7956.14	7952.9	7815.89	7974.39	8109.24	8191.92	8309.25		5796.84	5835.95	5896.89	6078.36	6115.43	6163.01	6314.89	6255.62	6293.31	6290.74	6182.37	6307.74	6414.41	6479.81	6572.62	39.4902	39490.2
广东省	1.619	7852.21	8057.99	8178.06	8299.62	8352.67	8398.63	8355.22	8341.5	8321.97	8111.09	8122.79	8400.13	8504.26	8591.54	8714.95		4530.73	4649.46	4718.74	4788.88	4819.49	4846.01	4820.96	4813.05	4801.78	4680.1	4686.85	4846.88	4906.96	4957.32	5028.53	39.8205	39820.5
广西壮族自治区	1.428	4277.45	4262.77	4244.73	4248.43	4178.17	4225.19	4194.55	4181.56	4227.51	4279.36	4357.38	4451.81	4498.36	4553.47	4587.27		6925.19	6901.42	6872.22	6878.21	6764.46	6840.58	6790.98	6769.95	6844.34	6928.28	7054.6	7207.48	7282.84	7372.07	7426.79	40.4082	40408.2
海南省	1.508	5964.99	5896.37	5899.88	6036.16	6076.46	5855.03	6078.81	5966.74	5969.88	5972.38	5989.21	6107.32	6177.52	6271.4	6352.35		8518.01	8420.02	8425.03	8619.64	8677.18	8360.98	8680.54	8520.5	8524.99	8528.56	8552.59	8721.25	8821.5	8955.56	9071.16	39.7206	39720.6
重庆市	0.398	800.44	786.75	782.4	786.57	772.48	779.4	757.5	731.9	709.44	712.94	676.24	676.86	684.78	687.18	702.36		1207.06	1186.42	1179.86	1186.15	1164.9	1175.34	1142.31	1103.71	1069.84	1075.11	1019.77	1020.7	1032.65	1036.27	1059.16	39.8709	39870.9
四川省	0.373	3110.74	3129.85	3225.78	3320.31	3318.49	3288.58	3311.32	3333.1	3339.56	3348.49	3345.74	3372.54	3409.26	3479.02	3506.19		1238.07	1245.68	1283.86	1321.48	1320.76	1308.85	1317.91	1326.57	1329.14	1332.7	1331.6	1342.27	1356.89	1384.65	1395.46	38.9952	38995.2
贵州省	0.574	9157.82	9158.73	9215.4	9319.58	9371.69	9377.7	9451.06	9493.82	9575.05	9615.32	9692.98	9849.89	9999.92	10227.4	10264.4		3415.87	3416.21	3437.34	3476.2	3495.64	3497.88	3525.25	3541.19	3571.49	3586.51	3615.48	3674.01	3729.97	3814.81	3828.62	39.9294	39929.4
云南省	0.509	4802.59	4896.93	4998.1	5201.03	5388.73	5510.5	5532.9	5604.8	5659.37	5477.16	5481.56	5475.35	5422.88	5359.45	5344.29		2756.69	2810.84	2868.91	2985.39	3093.13	3163.03	3175.88	3217.16	3248.48	3143.89	3146.42	3142.85	3112.73	3076.32	3067.62	39.5568	39556.8
西藏自治区	0.015	6381.56	6257.06	6484.91	6674.13	6848.56	6842.84	6818.64	6786.62	6790.8	6890.77	6938.86	6989.67	7057.24	7130.63	7218.08		3248.21	3184.84	3300.82	3397.13	3485.92	3483.01	3470.69	3454.39	3456.52	3507.4	3531.88	3557.74	3592.14	3629.49	3674	38.6343	38634.3
陕西省	0.179	214.62	218.86	219.04	220.24	225.77	227.1	229.69	263.15	254.05	270.38	271.53	272.08	274.19	277.24	281.4		3.2193	3.2829	3.2856	3.3036	3.38655	3.4065	3.44535	3.94725	3.81075	4.0557	4.07295	4.0812	4.11285	4.1586	4.221	36.9243	36924.3
甘肃省	0.029	4207.83	4237.57	4193.6	4182.84	4108.22	4053.87	4050	4160.15	4063.88	4091.01	4132.09	4160.85	4189.27	4212.23	4239.94		753.202	758.525	750.654	748.728	735.371	725.643	724.95	744.667	727.435	732.291	739.644	744.792	749.879	753.989	758.949	37.7253	37725.3
青海省	0.016	3693.94	3723.47	3774.33	3770.7	3779.84	3775.83	3768.38	3749.2	3752.03	3773.55	3831.57	3931.82	3997.94	4061.94	4139.59		107.124	107.981	109.456	109.35	109.615	109.499	109.283	108.727	108.809	109.433	111.116	114.023	115.94	117.796	120.048	39.33	39330
宁夏回族自治区	0.016	514.06	526.75	540.05	554.21	555.77	553.7	558.39	557.75	555.31	557.25	553.54	571.42	583.87	586.19	598.8		8.22496	8.428	8.6408	8.86736	8.89232	8.8592	8.93424	8.924	8.88496	8.916	8.85664	9.14272	9.34192	9.37904	9.5808	39.9159	39915.9
新疆维吾尔自治区	0.01	1205.32	1205.86	1205.76	1176.46	1147.08	1126.76	1132.43	1118.85	1132.63	1164.57	1152.96	1174.23	1175.91	1189.49	1199.1		19.2851	19.2938	19.2922	18.8234	18.3533	18.0282	18.1189	17.9016	18.1221	18.6331	18.4474	18.7877	18.8146	19.0318	19.1856	40.779	40779
		4036.09	4236.75	4475.41	4673.34	4744.47	5074.23	5175.47	5921.27	5886.96	6068.89	6169.99	6280.01	6387.42	6493.13	6839.83		40.3609	42.3675	44.7541	46.7334	47.4447	50.7423	51.7547	59.2127	58.8696	60.6889	61.6999	62.8001	63.8742	64.9313	68.3983	563.877	563877
																																	553.47	553470
																																	554.647	554647
																																	560.247	560247
																																	563.873	563873
																																	566.478	566478
																																	566.67	566670
																																	567.323	567323
																																	561.571	561571
																																	549.208	549208
																																	544.89	544890
																																	541.992	541992
																																	542.512	542512
																																	543.637	543637
																																	542.581	542581
																																	217.25	217250
																																	221.925	221925
																																	225.359	225359
																																	225.47	225470
																																	223.741	223741
																																	223.539	223539
																																	220.372	220372
																																	219.084	219084
																																	218.235	218235
																																	216.865	216865
																																	214.99	214990
																																	216.032	216032
																																	218.865	218865
																																	220.307	220307
																																	222.145	222145
																																	103.437	103437
																																	110.431	110431
																																	113.093	113093
																																	115.063	115063
																																	117.346	117346
																																	121.186	121186
																																	126.355	126355
																																	134.358	134358
																																	135.213	135213
																																	132.361	132361
																																	133.275	133275
																																	133.242	133242
																																	131.15	131150
																																	131.26	131260
																																	132.133	132133
																																	236.26	236260
																																	244.909	244909
																																	247.847	247847
																																	253.924	253924
																																	257.573	257573
																																	261.628	261628
																																	268.799	268799
																																	263.049	263049
																																	258.684	258684
																																	260.841	260841
																																	261.46	261460
																																	265.842	265842
																																	268.394	268394
																																	268.265	268265
																																	270.408	270408
																																	76.3663	76366.4
																																	78.8839	78883.9
																																	79.4584	79458.4
																																	81.4797	81479.7
																																	84.4942	84494.2
																																	88.3575	88357.5
																																	89.9686	89968.6
																																	90.9488	90948.8
																																	91.293	91293
																																	91.2134	91213.4
																																	91.7558	91755.8
																																	92.2648	92264.9
																																	92.8059	92805.9
																																	93.3954	93395.4
																																	94.3871	94387.1
																																	1335.43	1.33543e+06
																																	1388.16	1.38816e+06
																																	1429.96	1.42996e+06
																																	1448.69	1.44869e+06
																																	1478.05	1.47805e+06
																																	1507.76	1.50776e+06
																																	1540.44	1.54044e+06
																																	1542.26	1.54226e+06
																																	1535.83	1.53583e+06
																																	1526.03	1.52603e+06
																																	1536.09	1.53609e+06
																																	1550.65	1.55065e+06
																																	1566.76	1.56676e+06
																																	1581.78	1.58178e+06
																																	1591.64	1.59164e+06
																																	318.612	318612
																																	318.75	318750
																																	322.163	322163
																																	308.058	308058
																																	300.127	300127
																																	283.721	283721
																																	268.941	268941
																																	232.999	232999
																																	218.557	218557
																																	216.501	216501
																																	200.486	200486
																																	195.708	195708
																																	202.756	202756
																																	206.453	206453
																																	209.544	209544
																																	5192.99	5.19299e+06
																																	5231.11	5.23111e+06
																																	5263.42	5.26342e+06
																																	5306.02	5.30602e+06
																																	5326.15	5.32615e+06
																																	5338.67	5.33867e+06
																																	5393.28	5.39328e+06
																																	5355.57	5.35557e+06
																																	5297.04	5.29704e+06
																																	5271.68	5.27168e+06
																																	5217.28	5.21728e+06
																																	5242.36	5.24236e+06
																																	5267.63	5.26763e+06
																																	5281.5	5.2815e+06
																																	5320.56	5.32056e+06
																																	5975.78	5.97578e+06
																																	5678.63	5.67863e+06
																																	5544.87	5.54487e+06
																																	5123.91	5.12391e+06
																																	5042.69	5.04269e+06
																																	4857.65	4.85765e+06
																																	4835.72	4835721
																																	4759.09	4.75909e+06
																																	4843.81	4.84381e+06
																																	4837.87	4.83787e+06
																																	4889.07	4.88907e+06
																																	4925.45	4.92545e+06
																																	4925.67	4.92567e+06
																																	4956.41	4.95641e+06
																																	4991.17	4.99117e+06
																																	5363.85	5.36385e+06
																																	5387.67	5.38767e+06
																																	5391.26	5.39126e+06
																																	5359.04	5.35904e+06
																																	5375.45	5.37545e+06
																																	5453.1	5.4531e+06
																																	5509.42	5.50942e+06
																																	5045.52	5.04552e+06
																																	5009.11	5.00911e+06
																																	5034.62	5.03462e+06
																																	5040.85	5.04085e+06
																																	5061.53	5.06153e+06
																																	5101.01	5.10101e+06
																																	5127.88	5.12788e+06
																																	5191.23	5.19123e+06
																																	3011.27	3.01127e+06
																																	2823.52	2.82352e+06
																																	2726.39	2.72639e+06
																																	2555.54	2.55554e+06
																																	2526.13	2.52613e+06
																																	2423.42	2.42342e+06
																																	2346.51	2.34651e+06
																																	2247.31	2.24731e+06
																																	2248.09	2.24809e+06
																																	2288.68	2.28868e+06
																																	2320.57	2.32057e+06
																																	2366.97	2.36697e+06
																																	2396.86	2.39686e+06
																																	2440.79	2.44079e+06
																																	2484.47	2.48447e+06
																																	4719.99	4.71999e+06
																																	4734.3	4734300
																																	4769.91	4.76991e+06
																																	4813.27	4.81327e+06
																																	4847.8	4.8478e+06
																																	4873.91	4.87391e+06
																																	4892.03	4.89203e+06
																																	4875.24	4.87524e+06
																																	4849.08	4.84908e+06
																																	4778	4.778e+06
																																	4748.21	4.74821e+06
																																	4854.16	4.85416e+06
																																	4878.73	4.87873e+06
																																	4928.27	4928273
																																	4985.43	4.98543e+06
																																	207.29	207290
																																	202.871	202871
																																	204.874	204874
																																	206.383	206383
																																	211.596	211596
																																	215.016	215016
																																	216.239	216239
																																	214.294	214294
																																	211.048	211048
																																	210.459	210459
																																	207.729	207729
																																	206.892	206892
																																	208.023	208023
																																	208.319	208319
																																	209.052	209052
																																	3331.15	3.33115e+06
																																	3351.06	3.35106e+06
																																	3363.36	3.36336e+06
																																	3366.53	3.36653e+06
																																	3413.24	3413241
																																	3447.18	3.44718e+06
																																	3481.86	3.48186e+06
																																	3487.24	3.48724e+06
																																	3447.41	3.44741e+06
																																	3459.3	3.4593e+06
																																	3443.07	3.44307e+06
																																	3436.99	3.43699e+06
																																	3441	3.441e+06
																																	3442.49	3.44249e+06
																																	3450.83	3.45083e+06
																																	5796.84	5.79684e+06
																																	5835.95	5.83595e+06
																																	5896.89	5.89689e+06
																																	6078.36	6.07836e+06
																																	6115.43	6.11543e+06
																																	6163.01	6.16301e+06
																																	6314.89	6.31489e+06
																																	6255.62	6.25562e+06
																																	6293.31	6.29331e+06
																																	6290.74	6.29074e+06
																																	6182.37	6.18237e+06
																																	6307.74	6.30774e+06
																																	6414.41	6.41441e+06
																																	6479.81	6.47981e+06
																																	6572.62	6.57262e+06
																																	4530.73	4.53073e+06
																																	4649.46	4.64946e+06
																																	4718.74	4.71874e+06
																																	4788.88	4.78888e+06
																																	4819.49	4.81949e+06
																																	4846.01	4.84601e+06
																																	4820.96	4.82096e+06
																																	4813.05	4.81305e+06
																																	4801.78	4.80178e+06
																																	4680.1	4.6801e+06
																																	4686.85	4.68685e+06
																																	4846.88	4.84688e+06
																																	4906.96	4.90696e+06
																																	4957.32	4.95732e+06
																																	5028.53	5.02853e+06
																																	6925.19	6.92519e+06
																																	6901.42	6.90142e+06
																																	6872.22	6.87222e+06
																																	6878.21	6.87821e+06
																																	6764.46	6.76446e+06
																																	6840.58	6.84058e+06
																																	6790.98	6.79098e+06
																																	6769.95	6.76995e+06
																																	6844.34	6.84434e+06
																																	6928.28	6.92828e+06
																																	7054.6	7.0546e+06
																																	7207.48	7.20748e+06
																																	7282.84	7.28284e+06
																																	7372.07	7.37207e+06
																																	7426.79	7.42679e+06
																																	8518.01	8.51801e+06
																																	8420.02	8.42002e+06
																																	8425.03	8.42503e+06
																																	8619.64	8.61964e+06
																																	8677.18	8.67718e+06
																																	8360.98	8.36098e+06
																																	8680.54	8.68054e+06
																																	8520.5	8.5205e+06
																																	8524.99	8.52499e+06
																																	8528.56	8.52856e+06
																																	8552.59	8.55259e+06
																																	8721.25	8.72125e+06
																																	8821.5	8.8215e+06
																																	8955.56	8.95556e+06
																																	9071.16	9.07116e+06
																																	1207.06	1.20706e+06
																																	1186.42	1186419
																																	1179.86	1.17986e+06
																																	1186.15	1.18615e+06
																																	1164.9	1.1649e+06
																																	1175.34	1.17534e+06
																																	1142.31	1142310
																																	1103.71	1.10371e+06
																																	1069.84	1.06984e+06
																																	1075.11	1.07511e+06
																																	1019.77	1.01977e+06
																																	1020.7	1.0207e+06
																																	1032.65	1.03265e+06
																																	1036.27	1.03627e+06
																																	1059.16	1.05916e+06
																																	1238.07	1.23807e+06
																																	1245.68	1.24568e+06
																																	1283.86	1.28386e+06
																																	1321.48	1.32148e+06
																																	1320.76	1.32076e+06
																																	1308.85	1.30885e+06
																																	1317.91	1.31791e+06
																																	1326.57	1.32657e+06
																																	1329.14	1.32914e+06
																																	1332.7	1.3327e+06
																																	1331.6	1.3316e+06
																																	1342.27	1.34227e+06
																																	1356.89	1.35689e+06
																																	1384.65	1.38465e+06
																																	1395.46	1.39546e+06
																																	3415.87	3.41587e+06
																																	3416.21	3.41621e+06
																																	3437.34	3.43734e+06
																																	3476.2	3.4762e+06
																																	3495.64	3.49564e+06
																																	3497.88	3.49788e+06
																																	3525.25	3.52525e+06
																																	3541.19	3.54119e+06
																																	3571.49	3.57149e+06
																																	3586.51	3.58651e+06
																																	3615.48	3.61548e+06
																																	3674.01	3.67401e+06
																																	3729.97	3.72997e+06
																																	3814.81	3.81481e+06
																																	3828.62	3.82862e+06
																																	2756.69	2.75669e+06
																																	2810.84	2.81084e+06
																																	2868.91	2.86891e+06
																																	2985.39	2.98539e+06
																																	3093.13	3.09313e+06
																																	3163.03	3163027
																																	3175.88	3.17588e+06
																																	3217.16	3.21716e+06
																																	3248.48	3.24848e+06
																																	3143.89	3.14389e+06
																																	3146.42	3.14642e+06
																																	3142.85	3.14285e+06
																																	3112.73	3.11273e+06
																																	3076.32	3.07632e+06
																																	3067.62	3.06762e+06
																																	3248.21	3.24821e+06
																																	3184.84	3.18484e+06
																																	3300.82	3.30082e+06
																																	3397.13	3.39713e+06
																																	3485.92	3.48592e+06
																																	3483.01	3.48301e+06
																																	3470.69	3.47069e+06
																																	3454.39	3.45439e+06
																																	3456.52	3.45652e+06
																																	3507.4	3.5074e+06
																																	3531.88	3.53188e+06
																																	3557.74	3.55774e+06
																																	3592.14	3.59214e+06
																																	3629.49	3.62949e+06
																																	3674	3.674e+06
																																	3.2193	3219.3
																																	3.2829	3282.9
																																	3.2856	3285.6
																																	3.3036	3303.6
																																	3.38655	3386.55
																																	3.4065	3406.5
																																	3.44535	3445.35
																																	3.94725	3947.25
																																	3.81075	3810.75
																																	4.0557	4055.7
																																	4.07295	4072.95
																																	4.0812	4081.2
																																	4.11285	4112.85
																																	4.1586	4158.6
																																	4.221	4221
																																	753.202	753202
																																	758.525	758525
																																	750.654	750654
																																	748.728	748728
																																	735.371	735371
																																	725.643	725643
																																	724.95	724950
																																	744.667	744667
																																	727.435	727435
																																	732.291	732291
																																	739.644	739644
																																	744.792	744792
																																	749.879	749879
																																	753.989	753989
																																	758.949	758949
																																	107.124	107124
																																	107.981	107981
																																	109.456	109456
																																	109.35	109350
																																	109.615	109615
																																	109.499	109499
																																	109.283	109283
																																	108.727	108727
																																	108.809	108809
																																	109.433	109433
																																	111.116	111116
																																	114.023	114023
																																	115.94	115940
																																	117.796	117796
																																	120.048	120048
																																	8.22496	8224.96
																																	8.428	8428
																																	8.6408	8640.8
																																	8.86736	8867.36
																																	8.89232	8892.32
																																	8.8592	8859.2
																																	8.93424	8934.24
																																	8.924	8924
																																	8.88496	8884.96
																																	8.916	8916
																																	8.85664	8856.64
																																	9.14272	9142.72
																																	9.34192	9341.92
																																	9.37904	9379.04
																																	9.5808	9580.8
																																	19.2851	19285.1
																																	19.2938	19293.8
																																	19.2922	19292.2
																																	18.8234	18823.4
																																	18.3533	18353.3
																																	18.0282	18028.2
																																	18.1189	18118.9
																																	17.9016	17901.6
																																	18.1221	18122.1
																																	18.6331	18633.1
																																	18.4474	18447.4
																																	18.7877	18787.7
																																	18.8146	18814.6
																																	19.0318	19031.8
																																	19.1856	19185.6
																																	40.3609	40360.9
																																	42.3675	42367.5
																																	44.7541	44754.1
																																	46.7334	46733.4
																																	47.4447	47444.7
																																	50.7423	50742.3
																																	51.7547	51754.7
																																	59.2127	59212.7
																																	58.8696	58869.6
																																	60.6889	60688.9
																																	61.6999	61699.9
																																	62.8001	62800.1
																																	63.8742	63874.2
																																	64.9313	64931.3
																																	68.3983	68398.3

## Sheet: 粮食总氮排污
北京市	0.83																																粮食（千公顷）*总氮排污系数	粮食（公顷）*总氮排污系数
天津市	1.085	316.76	313.62	298.62	278.03	237.29	194.64	172.14	145.55	120.94	103.79	88.55	98.18	117.85	143.81	158.98		262.911	260.305	247.855	230.765	196.951	161.551	142.876	120.806	100.38	86.1457	73.4965	81.4894	97.8155	119.362	131.953	262.911	262911
河北省	0.775	440.31	438.78	442.45	448.98	441.34	443.01	433.28	443.66	439.52	429.27	410.27	419.17	437	443.51	453.1		477.736	476.076	480.058	487.143	478.854	480.666	470.109	481.371	476.879	465.758	445.143	454.799	474.145	481.208	491.613	260.305	260305
山西省	0.868	8416.08	8260.75	8278.32	8361.89	8416.01	8454.9	8457.76	8467.51	8381.65	8197.13	8132.69	8089.44	8097.2	8113.99	8098.23		6522.46	6402.08	6415.7	6480.46	6522.41	6552.55	6554.76	6562.32	6495.78	6352.78	6302.83	6269.32	6275.33	6288.34	6276.13	247.855	247855
内蒙古自治区	0.118	3561.48	3638.11	3694.41	3696.23	3667.89	3664.57	3612.65	3591.54	3577.62	3555.16	3524.42	3541.51	3587.95	3611.59	3641.72		3091.36	3157.88	3206.75	3208.33	3183.73	3180.85	3135.78	3117.46	3105.37	3085.88	3059.2	3074.03	3114.34	3134.86	3161.01	230.765	230765
辽宁省	0.736	6895.77	7362.07	7539.51	7670.84	7823.05	8079.08	8423.68	8957.21	9014.22	8824.07	8885.02	8882.81	8743.34	8750.68	8808.87		813.701	868.724	889.662	905.159	923.12	953.331	993.994	1056.95	1063.68	1041.24	1048.43	1048.17	1031.71	1032.58	1039.45	196.951	196951
吉林省	0.532	3810.64	3950.14	3997.53	4095.55	4154.41	4219.8	4335.47	4242.73	4172.32	4207.11	4217.1	4287.78	4328.94	4326.86	4361.42		2804.63	2907.3	2942.18	3014.32	3057.65	3105.77	3190.91	3122.65	3070.83	3096.43	3103.79	3155.81	3186.1	3184.57	3210.01	161.551	161551
黑龙江省	1.028	5091.09	5258.93	5297.23	5431.98	5632.95	5890.5	5997.91	6063.25	6086.2	6080.89	6117.05	6150.99	6187.06	6226.36	6292.47		2708.46	2797.75	2818.13	2889.81	2996.73	3133.75	3190.89	3225.65	3237.86	3235.03	3254.27	3272.33	3291.52	3312.42	3347.59	142.876	142876
上海市	6.055	12840.7	13347.6	13749.6	13929.7	14212	14497.7	14811.9	14829.5	14767.6	14673.3	14770.1	14910.1	15065	15209.4	15304.2		13200.2	13721.4	14134.6	14319.7	14609.9	14903.6	15226.6	15244.7	15181.1	15084.2	15183.6	15327.6	15486.9	15635.3	15732.7	120.806	120806
江苏省	6.484	415.4	415.58	420.03	401.64	391.3	369.91	350.64	303.78	284.95	282.27	261.39	255.16	264.35	269.17	273.2		2515.25	2516.34	2543.28	2431.93	2369.32	2239.81	2123.13	1839.39	1725.37	1709.14	1582.72	1544.99	1600.64	1629.82	1654.23	100.38	100380
浙江省	15.021	7407.98	7462.35	7508.44	7569.22	7597.93	7615.79	7693.7	7639.9	7556.4	7520.23	7442.63	7478.4	7514.45	7534.24	7589.96		48033.3	48385.9	48684.7	49078.8	49265	49380.8	49886	49537.1	48995.7	48761.2	48258	48489.9	48723.7	48852	49213.3	86.1457	86145.7
安徽省	5.415	2444.08	2322.55	2267.84	2095.67	2062.45	1986.77	1977.8	1946.46	1981.11	1978.68	1999.62	2014.5	2014.59	2027.16	2041.38		36712.5	34887	34065.2	31479.1	30980.1	29843.3	29708.5	29237.8	29758.3	29721.8	30036.3	30259.8	30261.2	30450	30663.6	73.4965	73496.5
福建省	11.188	9344.68	9386.19	9392.44	9336.3	9364.9	9500.18	9598.29	8790.1	8726.68	8771.11	8781.96	8817.99	8886.77	8933.59	9043.96		50601.4	50826.2	50860.1	50556.1	50710.9	51443.5	51974.7	47598.4	47255	47495.6	47554.3	47749.4	48121.9	48375.4	48973	81.4894	81489.4
江西省	6.682	2075.31	1945.91	1878.97	1761.23	1740.96	1670.17	1617.17	1548.8	1549.34	1577.31	1599.29	1631.27	1651.87	1682.14	1712.25		23218.6	21770.8	21021.9	19704.6	19477.9	18685.9	18092.9	17328	17334	17646.9	17892.9	18250.6	18481.1	18819.8	19156.7	97.8155	97815.5
山东省	0.817	5488.36	5505	5546.41	5596.83	5636.98	5667.34	5688.41	5668.88	5638.46	5555.81	5521.18	5644.37	5672.94	5730.55	5797.01		36673.2	36784.4	37061.1	37398	37666.3	37869.2	38010	37879.5	37676.2	37123.9	36892.5	37715.7	37906.6	38291.5	38735.6	119.362	119362
河南省	2.976	10910	10677.4	10782.9	10862.3	11136.6	11316.6	11381	11278.6	11107.8	11076.8	10933.1	10889.1	10948.6	10964.1	11002.7		8913.45	8723.44	8809.6	8874.47	9098.63	9245.7	9298.29	9214.62	9075.06	9049.75	8932.33	8896.36	8945	8957.7	8989.22	131.953	131953
湖北省	6.683	14235.7	14320.8	14373.3	14386.9	14586.5	14731.5	14879.7	14902.7	14732.5	14783.4	14714	14688	14705.1	14711.5	14747.1		42365.4	42618.7	42775	42815.4	43409.4	43841.1	44282.1	44350.5	43844	43995.2	43788.8	43711.5	43762.5	43781.5	43887.5	477.736	477736
湖南省	6.302	7328.5	7377.94	7454.98	7684.4	7731.26	7791.42	7983.43	7908.5	7956.14	7952.9	7815.89	7974.39	8109.24	8191.92	8309.25		48976.4	49306.8	49821.6	51354.8	51668	52070.1	53353.3	52852.5	53170.9	53149.2	52233.6	53292.8	54194.1	54746.6	55530.7	476.076	476076
广东省	11.554	7852.21	8057.99	8178.06	8299.62	8352.67	8398.63	8355.22	8341.5	8321.97	8111.09	8122.79	8400.13	8504.26	8591.54	8714.95		49484.6	50781.5	51538.1	52304.2	52638.5	52928.2	52654.6	52568.1	52445.1	51116.1	51189.8	52937.6	53593.8	54143.9	54921.6	480.058	480058
广西壮族自治区	11.426	4277.45	4262.77	4244.73	4248.43	4178.17	4225.19	4194.55	4181.56	4227.51	4279.36	4357.38	4451.81	4498.36	4553.47	4587.27		49421.7	49252	49043.6	49086.4	48274.6	48817.8	48463.8	48313.7	48844.7	49443.7	50345.2	51436.2	51974.1	52610.8	53001.3	487.143	487143
海南省	11.265	5964.99	5896.37	5899.88	6036.16	6076.46	5855.03	6078.81	5966.74	5969.88	5972.38	5989.21	6107.32	6177.52	6271.4	6352.35		68156	67371.9	67412	68969.2	69429.6	66899.6	69456.5	68176	68211.8	68240.4	68432.7	69782.2	70584.3	71657	72582	478.854	478854
重庆市	3.599	800.44	786.75	782.4	786.57	772.48	779.4	757.5	731.9	709.44	712.94	676.24	676.86	684.78	687.18	702.36		9016.96	8862.74	8813.74	8860.71	8701.99	8779.94	8533.24	8244.85	7991.84	8031.27	7617.84	7624.83	7714.05	7741.08	7912.09	480.666	480666
四川省	3.402	3110.74	3129.85	3225.78	3320.31	3318.49	3288.58	3311.32	3333.1	3339.56	3348.49	3345.74	3372.54	3409.26	3479.02	3506.19		11195.6	11264.3	11609.6	11949.8	11943.2	11835.6	11917.4	11995.8	12019.1	12051.2	12041.3	12137.8	12269.9	12521	12618.8	470.109	470109
贵州省	3.561	9157.82	9158.73	9215.4	9319.58	9371.69	9377.7	9451.06	9493.82	9575.05	9615.32	9692.98	9849.89	9999.92	10227.4	10264.4		31154.9	31158	31350.8	31705.2	31882.5	31902.9	32152.5	32298	32574.3	32711.3	32975.5	33509.3	34019.7	34793.5	34919.5	481.371	481371
云南省	6.387	4802.59	4896.93	4998.1	5201.03	5388.73	5510.5	5532.9	5604.8	5659.37	5477.16	5481.56	5475.35	5422.88	5359.45	5344.29		17102	17438	17798.2	18520.9	19189.3	19622.9	19702.7	19958.7	20153	19504.2	19519.8	19497.7	19310.9	19085	19031	476.879	476879
西藏自治区	0.177	6381.56	6257.06	6484.91	6674.13	6848.56	6842.84	6818.64	6786.62	6790.8	6890.77	6938.86	6989.67	7057.24	7130.63	7218.08		40759	39963.8	41419.1	42627.7	43741.8	43705.2	43550.7	43346.1	43372.8	44011.3	44318.5	44643	45074.6	45543.3	46101.9	465.758	465758
陕西省	1.494	214.62	218.86	219.04	220.24	225.77	227.1	229.69	263.15	254.05	270.38	271.53	272.08	274.19	277.24	281.4		37.9877	38.7382	38.7701	38.9825	39.9613	40.1967	40.6551	46.5776	44.9669	47.8573	48.0608	48.1582	48.5316	49.0715	49.8078	445.143	445143
甘肃省	0.403	4207.83	4237.57	4193.6	4182.84	4108.22	4053.87	4050	4160.15	4063.88	4091.01	4132.09	4160.85	4189.27	4212.23	4239.94		6286.5	6330.93	6265.24	6249.16	6137.68	6056.48	6050.7	6215.26	6071.44	6111.97	6173.34	6216.31	6258.77	6293.07	6334.47	454.799	454799
青海省	0.225	3693.94	3723.47	3774.33	3770.7	3779.84	3775.83	3768.38	3749.2	3752.03	3773.55	3831.57	3931.82	3997.94	4061.94	4139.59		1488.66	1500.56	1521.05	1519.59	1523.28	1521.66	1518.66	1510.93	1512.07	1520.74	1544.12	1584.52	1611.17	1636.96	1668.25	474.145	474145
宁夏回族自治区	0.187	514.06	526.75	540.05	554.21	555.77	553.7	558.39	557.75	555.31	557.25	553.54	571.42	583.87	586.19	598.8		115.663	118.519	121.511	124.697	125.048	124.582	125.638	125.494	124.945	125.381	124.546	128.57	131.371	131.893	134.73	481.208	481208
新疆维吾尔自治区	0.224	1205.32	1205.86	1205.76	1176.46	1147.08	1126.76	1132.43	1118.85	1132.63	1164.57	1152.96	1174.23	1175.91	1189.49	1199.1		225.395	225.496	225.477	219.998	214.504	210.704	211.764	209.225	211.802	217.775	215.604	219.581	219.895	222.435	224.232	491.613	491614
		4036.09	4236.75	4475.41	4673.34	4744.47	5074.23	5175.47	5921.27	5886.96	6068.89	6169.99	6280.01	6387.42	6493.13	6839.83		904.084	949.032	1002.49	1046.83	1062.76	1136.63	1159.31	1326.36	1318.68	1359.43	1382.08	1406.72	1430.78	1454.46	1532.12	6522.46	6522462
																																	6402.08	6.40208e+06
																																	6415.7	6415698
																																	6480.46	6.48046e+06
																																	6522.41	6.52241e+06
																																	6552.55	6.55255e+06
																																	6554.76	6554764
																																	6562.32	6.56232e+06
																																	6495.78	6.49578e+06
																																	6352.78	6.35278e+06
																																	6302.83	6.30283e+06
																																	6269.32	6269316
																																	6275.33	6275330
																																	6288.34	6.28834e+06
																																	6276.13	6.27613e+06
																																	3091.36	3.09136e+06
																																	3157.88	3.15788e+06
																																	3206.75	3.20675e+06
																																	3208.33	3.20833e+06
																																	3183.73	3.18373e+06
																																	3180.85	3.18085e+06
																																	3135.78	3.13578e+06
																																	3117.46	3.11746e+06
																																	3105.37	3.10537e+06
																																	3085.88	3.08588e+06
																																	3059.2	3.0592e+06
																																	3074.03	3.07403e+06
																																	3114.34	3.11434e+06
																																	3134.86	3.13486e+06
																																	3161.01	3.16101e+06
																																	813.701	813701
																																	868.724	868724
																																	889.662	889662
																																	905.159	905159
																																	923.12	923120
																																	953.331	953331
																																	993.994	993994
																																	1056.95	1.05695e+06
																																	1063.68	1.06368e+06
																																	1041.24	1.04124e+06
																																	1048.43	1.04843e+06
																																	1048.17	1.04817e+06
																																	1031.71	1.03171e+06
																																	1032.58	1.03258e+06
																																	1039.45	1.03945e+06
																																	2804.63	2.80463e+06
																																	2907.3	2.9073e+06
																																	2942.18	2.94218e+06
																																	3014.32	3.01432e+06
																																	3057.65	3.05765e+06
																																	3105.77	3.10577e+06
																																	3190.91	3.19091e+06
																																	3122.65	3.12265e+06
																																	3070.83	3.07083e+06
																																	3096.43	3.09643e+06
																																	3103.79	3.10379e+06
																																	3155.81	3.15581e+06
																																	3186.1	3.1861e+06
																																	3184.57	3.18457e+06
																																	3210.01	3.21001e+06
																																	2708.46	2.70846e+06
																																	2797.75	2.79775e+06
																																	2818.13	2.81813e+06
																																	2889.81	2.88981e+06
																																	2996.73	2.99673e+06
																																	3133.75	3133746
																																	3190.89	3.19089e+06
																																	3225.65	3225649
																																	3237.86	3.23786e+06
																																	3235.03	3.23503e+06
																																	3254.27	3.25427e+06
																																	3272.33	3.27233e+06
																																	3291.52	3.29152e+06
																																	3312.42	3.31242e+06
																																	3347.59	3.34759e+06
																																	13200.2	1.32002e+07
																																	13721.4	1.37214e+07
																																	14134.6	1.41346e+07
																																	14319.7	1.43197e+07
																																	14609.9	1.46099e+07
																																	14903.6	1.49036e+07
																																	15226.6	1.52266e+07
																																	15244.7	1.52447e+07
																																	15181.1	1.51811e+07
																																	15084.2	1.50842e+07
																																	15183.6	1.51836e+07
																																	15327.6	1.53276e+07
																																	15486.9	1.54869e+07
																																	15635.3	1.56353e+07
																																	15732.7	1.57327e+07
																																	2515.25	2515247
																																	2516.34	2.51634e+06
																																	2543.28	2.54328e+06
																																	2431.93	2.43193e+06
																																	2369.32	2.36932e+06
																																	2239.81	2.23981e+06
																																	2123.13	2.12313e+06
																																	1839.39	1.83939e+06
																																	1725.37	1.72537e+06
																																	1709.14	1.70914e+06
																																	1582.72	1.58272e+06
																																	1544.99	1.54499e+06
																																	1600.64	1.60064e+06
																																	1629.82	1.62982e+06
																																	1654.23	1654226
																																	48033.3	4.80333e+07
																																	48385.9	4.83859e+07
																																	48684.7	4.86847e+07
																																	49078.8	4.90788e+07
																																	49265	4.9265e+07
																																	49380.8	4.93808e+07
																																	49886	4.9886e+07
																																	49537.1	4.95371e+07
																																	48995.7	4.89957e+07
																																	48761.2	4.87612e+07
																																	48258	4.8258e+07
																																	48489.9	4.84899e+07
																																	48723.7	4.87237e+07
																																	48852	4.8852e+07
																																	49213.3	4.92133e+07
																																	36712.5	3.67125e+07
																																	34887	3.4887e+07
																																	34065.2	3.40652e+07
																																	31479.1	3.14791e+07
																																	30980.1	3.09801e+07
																																	29843.3	2.98433e+07
																																	29708.5	2.97085e+07
																																	29237.8	2.92378e+07
																																	29758.3	2.97583e+07
																																	29721.8	2.97218e+07
																																	30036.3	3.00363e+07
																																	30259.8	3.02598e+07
																																	30261.2	3.02612e+07
																																	30450	3.045e+07
																																	30663.6	3.06636e+07
																																	50601.4	5.06014e+07
																																	50826.2	5.08262e+07
																																	50860.1	5.08601e+07
																																	50556.1	5.05561e+07
																																	50710.9	5.07109e+07
																																	51443.5	5.14435e+07
																																	51974.7	5.19747e+07
																																	47598.4	4.75984e+07
																																	47255	4.7255e+07
																																	47495.6	4.74956e+07
																																	47554.3	4.75543e+07
																																	47749.4	4.77494e+07
																																	48121.9	4.81219e+07
																																	48375.4	4.83754e+07
																																	48973	4.8973e+07
																																	23218.6	2.32186e+07
																																	21770.8	2.17708e+07
																																	21021.9	2.10219e+07
																																	19704.6	1.97046e+07
																																	19477.9	1.94779e+07
																																	18685.9	1.86859e+07
																																	18092.9	1.80929e+07
																																	17328	1.7328e+07
																																	17334	1.7334e+07
																																	17646.9	1.76469e+07
																																	17892.9	1.78929e+07
																																	18250.6	1.82506e+07
																																	18481.1	1.84811e+07
																																	18819.8	1.88198e+07
																																	19156.7	19156653
																																	36673.2	3.66732e+07
																																	36784.4	36784410
																																	37061.1	3.70611e+07
																																	37398	3.7398e+07
																																	37666.3	3.76663e+07
																																	37869.2	3.78692e+07
																																	38010	3.801e+07
																																	37879.5	3.78795e+07
																																	37676.2	3.76762e+07
																																	37123.9	3.71239e+07
																																	36892.5	3.68925e+07
																																	37715.7	3.77157e+07
																																	37906.6	3.79066e+07
																																	38291.5	3.82915e+07
																																	38735.6	3.87356e+07
																																	8913.45	8.91345e+06
																																	8723.44	8.72344e+06
																																	8809.6	8.8096e+06
																																	8874.47	8.87447e+06
																																	9098.63	9.09863e+06
																																	9245.7	9.2457e+06
																																	9298.29	9.29829e+06
																																	9214.62	9.21462e+06
																																	9075.06	9.07506e+06
																																	9049.75	9.04975e+06
																																	8932.33	8.93233e+06
																																	8896.36	8.89636e+06
																																	8945	8.945e+06
																																	8957.7	8.9577e+06
																																	8989.22	8.98922e+06
																																	42365.4	4.23654e+07
																																	42618.7	4.26187e+07
																																	42775	4.2775e+07
																																	42815.4	4.28154e+07
																																	43409.4	43409424
																																	43841.1	4.38411e+07
																																	44282.1	4.42821e+07
																																	44350.5	4.43505e+07
																																	43844	4.3844e+07
																																	43995.2	4.39952e+07
																																	43788.8	4.37888e+07
																																	43711.5	4.37115e+07
																																	43762.5	4.37625e+07
																																	43781.5	4.37815e+07
																																	43887.5	4.38875e+07
																																	48976.4	4.89764e+07
																																	49306.8	4.93068e+07
																																	49821.6	4.98216e+07
																																	51354.8	5.13548e+07
																																	51668	5.1668e+07
																																	52070.1	5.20701e+07
																																	53353.3	5.33533e+07
																																	52852.5	5.28525e+07
																																	53170.9	5.31709e+07
																																	53149.2	5.31492e+07
																																	52233.6	5.22336e+07
																																	53292.8	5.32928e+07
																																	54194.1	5.41941e+07
																																	54746.6	5.47466e+07
																																	55530.7	5.55307e+07
																																	49484.6	4.94846e+07
																																	50781.5	5.07815e+07
																																	51538.1	5.15381e+07
																																	52304.2	5.23042e+07
																																	52638.5	5.26385e+07
																																	52928.2	5.29282e+07
																																	52654.6	5.26546e+07
																																	52568.1	52568133
																																	52445.1	5.24451e+07
																																	51116.1	5.11161e+07
																																	51189.8	5.11898e+07
																																	52937.6	5.29376e+07
																																	53593.8	5.35938e+07
																																	54143.9	5.41439e+07
																																	54921.6	5.49216e+07
																																	49421.7	4.94217e+07
																																	49252	4.9252e+07
																																	49043.6	4.90436e+07
																																	49086.4	4.90864e+07
																																	48274.6	4.82746e+07
																																	48817.8	4.88178e+07
																																	48463.8	4.84638e+07
																																	48313.7	4.83137e+07
																																	48844.7	4.88447e+07
																																	49443.7	4.94437e+07
																																	50345.2	5.03452e+07
																																	51436.2	5.14362e+07
																																	51974.1	5.19741e+07
																																	52610.8	5.26108e+07
																																	53001.3	5.30013e+07
																																	68156	6.8156e+07
																																	67371.9	6.73719e+07
																																	67412	6.7412e+07
																																	68969.2	6.89692e+07
																																	69429.6	6.94296e+07
																																	66899.6	6.68996e+07
																																	69456.5	6.94565e+07
																																	68176	6.8176e+07
																																	68211.8	6.82118e+07
																																	68240.4	6.82404e+07
																																	68432.7	6.84327e+07
																																	69782.2	6.97822e+07
																																	70584.3	7.05843e+07
																																	71657	7.1657e+07
																																	72582	7.2582e+07
																																	9016.96	9.01696e+06
																																	8862.74	8.86274e+06
																																	8813.74	8813736
																																	8860.71	8.86071e+06
																																	8701.99	8.70199e+06
																																	8779.94	8779941
																																	8533.24	8.53324e+06
																																	8244.85	8.24485e+06
																																	7991.84	7.99184e+06
																																	8031.27	8.03127e+06
																																	7617.84	7.61784e+06
																																	7624.83	7.62483e+06
																																	7714.05	7.71405e+06
																																	7741.08	7.74108e+06
																																	7912.09	7.91209e+06
																																	11195.6	1.11956e+07
																																	11264.3	1.12643e+07
																																	11609.6	1.16096e+07
																																	11949.8	1.19498e+07
																																	11943.2	1.19432e+07
																																	11835.6	1.18356e+07
																																	11917.4	1.19174e+07
																																	11995.8	1.19958e+07
																																	12019.1	1.20191e+07
																																	12051.2	1.20512e+07
																																	12041.3	1.20413e+07
																																	12137.8	1.21378e+07
																																	12269.9	1.22699e+07
																																	12521	1.2521e+07
																																	12618.8	1.26188e+07
																																	31154.9	3.11549e+07
																																	31158	3.1158e+07
																																	31350.8	3.13508e+07
																																	31705.2	3.17052e+07
																																	31882.5	3.18825e+07
																																	31902.9	3.19029e+07
																																	32152.5	3.21525e+07
																																	32298	3.2298e+07
																																	32574.3	3.25743e+07
																																	32711.3	3.27113e+07
																																	32975.5	3.29755e+07
																																	33509.3	3.35093e+07
																																	34019.7	3.40197e+07
																																	34793.5	3.47935e+07
																																	34919.5	3.49195e+07
																																	17102	1.7102e+07
																																	17438	1.7438e+07
																																	17798.2	1.77982e+07
																																	18520.9	1.85209e+07
																																	19189.3	1.91893e+07
																																	19622.9	1.96229e+07
																																	19702.7	1.97027e+07
																																	19958.7	1.99587e+07
																																	20153	2.0153e+07
																																	19504.2	1.95042e+07
																																	19519.8	1.95198e+07
																																	19497.7	1.94977e+07
																																	19310.9	1.93109e+07
																																	19085	1.9085e+07
																																	19031	1.9031e+07
																																	40759	4.0759e+07
																																	39963.8	3.99638e+07
																																	41419.1	4.14191e+07
																																	42627.7	4.26277e+07
																																	43741.8	4.37418e+07
																																	43705.2	4.37052e+07
																																	43550.7	4.35507e+07
																																	43346.1	4.33461e+07
																																	43372.8	4.33728e+07
																																	44011.3	4.40113e+07
																																	44318.5	4.43185e+07
																																	44643	4.4643e+07
																																	45074.6	4.50746e+07
																																	45543.3	4.55433e+07
																																	46101.9	4.61019e+07
																																	37.9877	37987.7
																																	38.7382	38738.2
																																	38.7701	38770.1
																																	38.9825	38982.5
																																	39.9613	39961.3
																																	40.1967	40196.7
																																	40.6551	40655.1
																																	46.5776	46577.6
																																	44.9669	44966.8
																																	47.8573	47857.3
																																	48.0608	48060.8
																																	48.1582	48158.2
																																	48.5316	48531.6
																																	49.0715	49071.5
																																	49.8078	49807.8
																																	6286.5	6.2865e+06
																																	6330.93	6.33093e+06
																																	6265.24	6.26524e+06
																																	6249.16	6.24916e+06
																																	6137.68	6.13768e+06
																																	6056.48	6.05648e+06
																																	6050.7	6050700
																																	6215.26	6.21526e+06
																																	6071.44	6.07144e+06
																																	6111.97	6.11197e+06
																																	6173.34	6.17334e+06
																																	6216.31	6.21631e+06
																																	6258.77	6.25877e+06
																																	6293.07	6.29307e+06
																																	6334.47	6.33447e+06
																																	1488.66	1.48866e+06
																																	1500.56	1.50056e+06
																																	1521.05	1.52105e+06
																																	1519.59	1.51959e+06
																																	1523.28	1.52328e+06
																																	1521.66	1.52166e+06
																																	1518.66	1.51866e+06
																																	1510.93	1.51093e+06
																																	1512.07	1.51207e+06
																																	1520.74	1.52074e+06
																																	1544.12	1.54412e+06
																																	1584.52	1.58452e+06
																																	1611.17	1.61117e+06
																																	1636.96	1.63696e+06
																																	1668.25	1.66825e+06
																																	115.663	115664
																																	118.519	118519
																																	121.511	121511
																																	124.697	124697
																																	125.048	125048
																																	124.582	124582
																																	125.638	125638
																																	125.494	125494
																																	124.945	124945
																																	125.381	125381
																																	124.546	124546
																																	128.57	128570
																																	131.371	131371
																																	131.893	131893
																																	134.73	134730
																																	225.395	225395
																																	225.496	225496
																																	225.477	225477
																																	219.998	219998
																																	214.504	214504
																																	210.704	210704
																																	211.764	211764
																																	209.225	209225
																																	211.802	211802
																																	217.775	217775
																																	215.604	215604
																																	219.581	219581
																																	219.895	219895
																																	222.435	222435
																																	224.232	224232
																																	904.084	904084
																																	949.032	949032
																																	1002.49	1.00249e+06
																																	1046.83	1.04683e+06
																																	1062.76	1.06276e+06
																																	1136.63	1.13663e+06
																																	1159.31	1.15931e+06
																																	1326.36	1.32636e+06
																																	1318.68	1.31868e+06
																																	1359.43	1.35943e+06
																																	1382.08	1.38208e+06
																																	1406.72	1.40672e+06
																																	1430.78	1.43078e+06
																																	1454.46	1.45446e+06
																																	1532.12	1.53212e+06

[truncated: 47 more sheets: 畜牧养殖业 规模化率 养殖户率, 畜禽养殖业不同类别存栏量, 生猪存栏规模化 CODcr, 生猪存栏 养殖户CODcr, 生猪存栏规模化 总氮, 生猪存栏 养殖户总氮 , 生猪存栏规模化 总磷, 生猪存栏 养殖户总磷, 肉牛 规模CODcr, 肉牛养殖CODcr, 肉牛规模 总氮, 肉牛养殖 总氮, 肉牛规模 总磷, 肉牛养殖 总磷, 奶牛规模CODcr, 奶牛养殖 CODcr, 奶牛规模 总氮, 奶牛养殖 总氮, 奶牛规模 总磷, 奶牛养殖 总磷 …]
